# Supplementary material
Source: PubMed Central journal article supplement (PMC9059426)
Supplement: NIHMS1738657-supplement-Supplemental_Material_2.pdf [file NIHMS1738657-supplement-Supplemental_Material_2.pdf]

**Complete list of sentences used in Expt. 1.**

| <b>List set</b> | <b>Block</b> | <b>Trial no.</b> | <b>Experimental vs. filler</b> | <b>Contrast</b> | <b>Type</b> | <b>Sentence</b>                        |
|-----------------|--------------|------------------|--------------------------------|-----------------|-------------|----------------------------------------|
| 1.1-1.4         | Practice     | 1                | Experimental                   | Color           | Context     | Click on the yellow star.              |
| 1.1-1.4         | Practice     | 1                | Experimental                   | Color           | Critical    | Now click on the purple star.          |
| 1.1-1.4         | Practice     | 2                | Filler                         | Shape           | Context     | Click on the black rectangle.          |
| 1.1-1.4         | Practice     | 2                | Filler                         | Shape           | Critical    | Now click on the black oval.           |
| 1.1-1.4         | Practice     | 3                | Filler                         | Neither         | Context     | Click on the blue square.              |
| 1.1-1.4         | Practice     | 3                | Filler                         | Neither         | Critical    | Now click on the blue square.          |
| 1.1-1.4         | Practice     | 4                | Filler                         | Shape           | Context     | Click on the white square.             |
| 1.1-1.4         | Practice     | 4                | Filler                         | Shape           | Critical    | Now click on the white rectangle.      |
| 1.1-1.4         | Practice     | 5                | Experimental                   | Both            | Context     | Click on the blue diamond.             |
| 1.1-1.4         | Practice     | 5                | Experimental                   | Both            | Critical    | Now click on the orange heart.         |
| 1.1-1.4         | Practice     | 6                | Experimental                   | Color           | Context     | Click on the red triangle.             |
| 1.1-1.4         | Practice     | 6                | Experimental                   | Color           | Critical    | Now click on the green triangle.       |
| 1.1-1.4         | Practice     | 7                | Filler                         | Neither         | Context     | Click on the yellow diamond.           |
| 1.1-1.4         | Practice     | 7                | Filler                         | Neither         | Critical    | Now click on the yellow diamond again. |
| 1.1-1.4         | Practice     | 8                | Experimental                   | Both            | Context     | Click on the purple heart.             |
| 1.1-1.4         | Practice     | 8                | Experimental                   | Both            | Critical    | Now click on the red circle.           |
| 1.1-1.4         | Experimental | 1                | Experimental                   | Color           | Context     | Click on the blue star.                |
| 1.1-1.4         | Experimental | 1                | Experimental                   | Color           | Critical    | Now click on the white star.           |
| 1.1-1.4         | Experimental | 2                | Experimental                   | Both            | Context     | Click on the yellow rectangle.         |
| 1.1-1.4         | Experimental | 2                | Experimental                   | Both            | Critical    | Now click on the green oval.           |
| 1.1-1.4         | Experimental | 3                | Filler                         | Shape           | Context     | Click on the white circle.             |
| 1.1-1.4         | Experimental | 3                | Filler                         | Shape           | Critical    | Now click on the white star.           |
| 1.1-1.4         | Experimental | 4                | Experimental                   | Both            | Context     | Click on the purple square.            |
| 1.1-1.4         | Experimental | 4                | Experimental                   | Both            | Critical    | Now click on the white heart.          |
| 1.1-1.4         | Experimental | 5                | Experimental                   | Both            | Context     | Click on the yellow rectangle.         |
| 1.1-1.4         | Experimental | 5                | Experimental                   | Both            | Critical    | Now click on the blue triangle.        |
| 1.1-1.4         | Experimental | 6                | Filler                         | Neither         | Context     | Click on the yellow square.            |
| 1.1-1.4         | Experimental | 6                | Filler                         | Neither         | Critical    | Now click on the yellow square.        |

|         |              |    |              |         |          |                                    |
|---------|--------------|----|--------------|---------|----------|------------------------------------|
| 1.1-1.4 | Experimental | 7  | Filler       | Neither | Context  | Click on the black rectangle.      |
| 1.1-1.4 | Experimental | 7  | Filler       | Neither | Critical | Now click on the black rectangle.  |
| 1.1-1.4 | Experimental | 8  | Filler       | Shape   | Context  | Click on the black circle.         |
| 1.1-1.4 | Experimental | 8  | Filler       | Shape   | Critical | Now click on the black diamond.    |
| 1.1-1.4 | Experimental | 9  | Experimental | Color   | Context  | Click on the white triangle.       |
| 1.1-1.4 | Experimental | 9  | Experimental | Color   | Critical | Now click on the orange triangle.  |
| 1.1-1.4 | Experimental | 10 | Filler       | Neither | Context  | Click on the white oval.           |
| 1.1-1.4 | Experimental | 10 | Filler       | Neither | Critical | Now click on the white oval.       |
| 1.1-1.4 | Experimental | 11 | Experimental | Color   | Context  | Click on the purple star.          |
| 1.1-1.4 | Experimental | 11 | Experimental | Color   | Critical | Now click on the red star.         |
| 1.1-1.4 | Experimental | 12 | Filler       | Shape   | Context  | Click on the yellow diamond.       |
| 1.1-1.4 | Experimental | 12 | Filler       | Shape   | Critical | Now click on the yellow circle.    |
| 1.1-1.4 | Experimental | 13 | Experimental | Color   | Context  | Click on the yellow star.          |
| 1.1-1.4 | Experimental | 13 | Experimental | Color   | Critical | Now click on the purple star.      |
| 1.1-1.4 | Experimental | 14 | Experimental | Both    | Context  | Click on the white circle.         |
| 1.1-1.4 | Experimental | 14 | Experimental | Both    | Critical | Now click on the orange rectangle. |
| 1.1-1.4 | Experimental | 15 | Filler       | Shape   | Context  | Click on the purple circle.        |
| 1.1-1.4 | Experimental | 15 | Filler       | Shape   | Critical | Now click on the purple diamond.   |
| 1.1-1.4 | Experimental | 16 | Filler       | Shape   | Context  | Click on the green star.           |
| 1.1-1.4 | Experimental | 16 | Filler       | Shape   | Critical | Now click on the green diamond.    |
| 1.1-1.4 | Experimental | 17 | Filler       | Neither | Context  | Click on the red circle.           |
| 1.1-1.4 | Experimental | 17 | Filler       | Neither | Critical | Now click on the red circle.       |
| 1.1-1.4 | Experimental | 18 | Experimental | Color   | Context  | Click on the green oval.           |
| 1.1-1.4 | Experimental | 18 | Experimental | Color   | Critical | Now click on the orange oval.      |
| 1.1-1.4 | Experimental | 19 | Experimental | Color   | Context  | Click on the yellow circle.        |
| 1.1-1.4 | Experimental | 19 | Experimental | Color   | Critical | Now click on the orange circle.    |
| 1.1-1.4 | Experimental | 20 | Filler       | Neither | Context  | Click on the green square.         |
| 1.1-1.4 | Experimental | 20 | Filler       | Neither | Critical | Now click on the green square.     |
| 1.1-1.4 | Experimental | 21 | Filler       | Shape   | Context  | Click on the blue circle.          |
| 1.1-1.4 | Experimental | 21 | Filler       | Shape   | Critical | Now click on the blue heart.       |
| 1.1-1.4 | Experimental | 22 | Experimental | Color   | Context  | Click on the black rectangle.      |
| 1.1-1.4 | Experimental | 22 | Experimental | Color   | Critical | Now click on the red rectangle.    |

|         |              |    |              |         |          |                                    |
|---------|--------------|----|--------------|---------|----------|------------------------------------|
| 1.1-1.4 | Experimental | 23 | Filler       | Shape   | Context  | Click on the orange triangle.      |
| 1.1-1.4 | Experimental | 23 | Filler       | Shape   | Critical | Now click on the orange square.    |
| 1.1-1.4 | Experimental | 24 | Filler       | Neither | Context  | Click on the blue diamond.         |
| 1.1-1.4 | Experimental | 24 | Filler       | Neither | Critical | Now click on the blue diamond.     |
| 1.1-1.4 | Experimental | 25 | Experimental | Both    | Context  | Click on the white heart.          |
| 1.1-1.4 | Experimental | 25 | Experimental | Both    | Critical | Now click on the yellow square.    |
| 1.1-1.4 | Experimental | 26 | Filler       | Shape   | Context  | Click on the red diamond.          |
| 1.1-1.4 | Experimental | 26 | Filler       | Shape   | Critical | Now click on the red rectangle.    |
| 1.1-1.4 | Experimental | 27 | Filler       | Neither | Context  | Click on the orange star.          |
| 1.1-1.4 | Experimental | 27 | Filler       | Neither | Critical | Now click on the orange star.      |
| 1.1-1.4 | Experimental | 28 | Filler       | Neither | Context  | Click on the purple heart.         |
| 1.1-1.4 | Experimental | 28 | Filler       | Neither | Critical | Now click on the purple heart.     |
| 1.1-1.4 | Experimental | 29 | Experimental | Both    | Context  | Click on the orange circle.        |
| 1.1-1.4 | Experimental | 29 | Experimental | Both    | Critical | Now click on the red oval.         |
| 1.1-1.4 | Experimental | 30 | Experimental | Both    | Context  | Click on the black triangle.       |
| 1.1-1.4 | Experimental | 30 | Experimental | Both    | Critical | Now click on the red circle.       |
| 1.1-1.4 | Experimental | 31 | Experimental | Both    | Context  | Click on the blue diamond.         |
| 1.1-1.4 | Experimental | 31 | Experimental | Both    | Critical | Now click on the orange star.      |
| 1.1-1.4 | Experimental | 32 | Experimental | Color   | Context  | Click on the orange diamond.       |
| 1.1-1.4 | Experimental | 32 | Experimental | Color   | Critical | Now click on the blue diamond.     |
| 1.1-1.4 | Experimental | 33 | Filler       | Neither | Context  | Click on the orange square.        |
| 1.1-1.4 | Experimental | 33 | Filler       | Neither | Critical | Now click on the orange square.    |
| 1.1-1.4 | Experimental | 34 | Experimental | Both    | Context  | Click on the white triangle.       |
| 1.1-1.4 | Experimental | 34 | Experimental | Both    | Critical | Now click on the black star.       |
| 1.1-1.4 | Experimental | 35 | Filler       | Shape   | Context  | Click on the purple diamond.       |
| 1.1-1.4 | Experimental | 35 | Filler       | Shape   | Critical | Now click on the purple rectangle. |
| 1.1-1.4 | Experimental | 36 | Filler       | Neither | Context  | Click on the yellow diamond.       |
| 1.1-1.4 | Experimental | 36 | Filler       | Neither | Critical | Now click on the yellow diamond.   |
| 1.1-1.4 | Experimental | 37 | Filler       | Neither | Context  | Click on the green oval.           |
| 1.1-1.4 | Experimental | 37 | Filler       | Neither | Critical | Now click on the green oval.       |
| 1.1-1.4 | Experimental | 38 | Experimental | Color   | Context  | Click on the black triangle.       |
| 1.1-1.4 | Experimental | 38 | Experimental | Color   | Critical | Now click on red triangle.         |

|         |              |    |              |         |          |                                    |
|---------|--------------|----|--------------|---------|----------|------------------------------------|
| 1.1-1.4 | Experimental | 39 | Filler       | Shape   | Context  | Click on the yellow heart.         |
| 1.1-1.4 | Experimental | 39 | Filler       | Shape   | Critical | Now click on the yellow rectangle. |
| 1.1-1.4 | Experimental | 40 | Filler       | Neither | Context  | Click on the black circle.         |
| 1.1-1.4 | Experimental | 40 | Filler       | Neither | Critical | Now click on the black circle.     |
| 1.1-1.4 | Experimental | 41 | Filler       | Shape   | Context  | Click on the black oval.           |
| 1.1-1.4 | Experimental | 41 | Filler       | Shape   | Critical | Now click on the black square.     |
| 1.1-1.4 | Experimental | 42 | Experimental | Color   | Context  | Click on the white heart.          |
| 1.1-1.4 | Experimental | 42 | Experimental | Color   | Critical | Now click on the green heart.      |
| 1.1-1.4 | Experimental | 43 | Experimental | Both    | Context  | Click on the red star.             |
| 1.1-1.4 | Experimental | 43 | Experimental | Both    | Critical | Now click on the white triangle.   |
| 1.1-1.4 | Experimental | 44 | Filler       | Neither | Context  | Click on the purple rectangle.     |
| 1.1-1.4 | Experimental | 44 | Filler       | Neither | Critical | Now click on the purple rectangle. |
| 1.1-1.4 | Experimental | 45 | Experimental | Color   | Context  | Click on the green triangle.       |
| 1.1-1.4 | Experimental | 45 | Experimental | Color   | Critical | Now click on the purple triangle.  |
| 1.1-1.4 | Experimental | 46 | Experimental | Both    | Context  | Click on the green diamond.        |
| 1.1-1.4 | Experimental | 46 | Experimental | Both    | Critical | Now click on the black square.     |
| 1.1-1.4 | Experimental | 47 | Filler       | Neither | Context  | Click on the blue star.            |
| 1.1-1.4 | Experimental | 47 | Filler       | Neither | Critical | Now click on the blue star.        |
| 1.1-1.4 | Experimental | 48 | Experimental | Color   | Context  | Click on the blue circle.          |
| 1.1-1.4 | Experimental | 48 | Experimental | Color   | Critical | Now click on the yellow circle.    |
| 1.1-1.4 | Experimental | 49 | Filler       | Shape   | Context  | Click on the red square.           |
| 1.1-1.4 | Experimental | 49 | Filler       | Shape   | Critical | Now click on the red triangle.     |
| 1.1-1.4 | Experimental | 50 | Experimental | Color   | Context  | Click on the purple circle.        |
| 1.1-1.4 | Experimental | 50 | Experimental | Color   | Critical | Now click on the blue circle.      |
| 1.1-1.4 | Experimental | 51 | Filler       | Neither | Context  | Click on the red square.           |
| 1.1-1.4 | Experimental | 51 | Filler       | Neither | Critical | Now click on the red square.       |
| 1.1-1.4 | Experimental | 52 | Experimental | Color   | Context  | Click on the yellow heart.         |
| 1.1-1.4 | Experimental | 52 | Experimental | Color   | Critical | Now click on the orange heart.     |
| 1.1-1.4 | Experimental | 53 | Experimental | Both    | Context  | Click on the red oval.             |
| 1.1-1.4 | Experimental | 53 | Experimental | Both    | Critical | Now click on the green heart.      |
| 1.1-1.4 | Experimental | 54 | Filler       | Shape   | Context  | Click on the black circle.         |
| 1.1-1.4 | Experimental | 54 | Filler       | Shape   | Critical | Now click on the black heart.      |

|         |              |    |              |         |          |                                    |
|---------|--------------|----|--------------|---------|----------|------------------------------------|
| 1.1-1.4 | Experimental | 55 | Filler       | Shape   | Context  | Click on the orange rectangle.     |
| 1.1-1.4 | Experimental | 55 | Filler       | Shape   | Critical | Now click on the orange heart.     |
| 1.1-1.4 | Experimental | 56 | Filler       | Neither | Context  | Click on the white heart.          |
| 1.1-1.4 | Experimental | 56 | Filler       | Neither | Critical | Now click on the white heart.      |
| 1.1-1.4 | Experimental | 57 | Filler       | Shape   | Context  | Click on the green square.         |
| 1.1-1.4 | Experimental | 57 | Filler       | Shape   | Critical | Now click on the green heart.      |
| 1.1-1.4 | Experimental | 58 | Filler       | Neither | Context  | Click on the orange circle.        |
| 1.1-1.4 | Experimental | 58 | Filler       | Neither | Critical | Now click on the orange circle.    |
| 1.1-1.4 | Experimental | 59 | Filler       | Neither | Context  | Click on the yellow oval.          |
| 1.1-1.4 | Experimental | 59 | Filler       | Neither | Critical | Now click on the yellow oval.      |
| 1.1-1.4 | Experimental | 60 | Experimental | Both    | Context  | Click on the blue oval.            |
| 1.1-1.4 | Experimental | 60 | Experimental | Both    | Critical | Now click on the yellow triangle.  |
| 1.1-1.4 | Experimental | 61 | Experimental | Color   | Context  | Click on the yellow oval.          |
| 1.1-1.4 | Experimental | 61 | Experimental | Color   | Critical | Now click on the blue oval.        |
| 1.1-1.4 | Experimental | 62 | Experimental | Color   | Context  | Click on the blue triangle.        |
| 1.1-1.4 | Experimental | 62 | Experimental | Color   | Critical | Now click on the yellow triangle.  |
| 1.1-1.4 | Experimental | 63 | Filler       | Shape   | Context  | Click on the white heart.          |
| 1.1-1.4 | Experimental | 63 | Filler       | Shape   | Critical | Now click on the white triangle.   |
| 1.1-1.4 | Experimental | 64 | Filler       | Neither | Context  | Click on the green triangle.       |
| 1.1-1.4 | Experimental | 64 | Filler       | Neither | Critical | Now click on the green triangle.   |
| 1.1-1.4 | Experimental | 65 | Experimental | Both    | Context  | Click on the green square.         |
| 1.1-1.4 | Experimental | 65 | Experimental | Both    | Critical | Now click on the blue circle.      |
| 1.1-1.4 | Experimental | 66 | Experimental | Both    | Context  | Click on the white star.           |
| 1.1-1.4 | Experimental | 66 | Experimental | Both    | Critical | Now click on the orange diamond.   |
| 1.1-1.4 | Experimental | 67 | Experimental | Both    | Context  | Click on the white diamond.        |
| 1.1-1.4 | Experimental | 67 | Experimental | Both    | Critical | Now click on the purple heart.     |
| 1.1-1.4 | Experimental | 68 | Filler       | Shape   | Context  | Click on the orange oval.          |
| 1.1-1.4 | Experimental | 68 | Filler       | Shape   | Critical | Now click on the orange rectangle. |
| 1.1-1.4 | Experimental | 69 | Experimental | Color   | Context  | Click on the white star.           |
| 1.1-1.4 | Experimental | 69 | Experimental | Color   | Critical | Now click on the green star.       |
| 1.1-1.4 | Experimental | 70 | Experimental | Both    | Context  | Click on the green square.         |
| 1.1-1.4 | Experimental | 70 | Experimental | Both    | Critical | Now click on the black oval.       |

|         |              |    |              |         |          |                                    |
|---------|--------------|----|--------------|---------|----------|------------------------------------|
| 1.1-1.4 | Experimental | 71 | Experimental | Both    | Context  | Click on the purple star.          |
| 1.1-1.4 | Experimental | 71 | Experimental | Both    | Critical | Now click on the green triangle.   |
| 1.1-1.4 | Experimental | 72 | Filler       | Shape   | Context  | Click on the green diamond.        |
| 1.1-1.4 | Experimental | 72 | Filler       | Shape   | Critical | Now click on the green oval.       |
| 1.1-1.4 | Experimental | 73 | Experimental | Color   | Context  | Click on the black heart.          |
| 1.1-1.4 | Experimental | 73 | Experimental | Color   | Critical | Now click on the white heart.      |
| 1.1-1.4 | Experimental | 74 | Experimental | Both    | Context  | Click on the yellow oval.          |
| 1.1-1.4 | Experimental | 74 | Experimental | Both    | Critical | Now click on the white diamond.    |
| 1.1-1.4 | Experimental | 75 | Filler       | Shape   | Context  | Click on the blue square.          |
| 1.1-1.4 | Experimental | 75 | Filler       | Shape   | Critical | Now click on the blue oval.        |
| 1.1-1.4 | Experimental | 76 | Experimental | Both    | Context  | Click on the blue rectangle.       |
| 1.1-1.4 | Experimental | 76 | Experimental | Both    | Critical | Now click on the purple circle.    |
| 1.1-1.4 | Experimental | 77 | Filler       | Shape   | Context  | Click on the black oval.           |
| 1.1-1.4 | Experimental | 77 | Filler       | Shape   | Critical | Now click on the black triangle.   |
| 1.1-1.4 | Experimental | 78 | Experimental | Color   | Context  | Click on the white square.         |
| 1.1-1.4 | Experimental | 78 | Experimental | Color   | Critical | Now click on the purple square.    |
| 1.1-1.4 | Experimental | 79 | Experimental | Both    | Context  | Click on the orange heart.         |
| 1.1-1.4 | Experimental | 79 | Experimental | Both    | Critical | Now click on the blue square.      |
| 1.1-1.4 | Experimental | 80 | Filler       | Shape   | Context  | Click on the red triangle.         |
| 1.1-1.4 | Experimental | 80 | Filler       | Shape   | Critical | Now click on the red star.         |
| 1.1-1.4 | Experimental | 81 | Filler       | Neither | Context  | Click on the black heart.          |
| 1.1-1.4 | Experimental | 81 | Filler       | Neither | Critical | Now click on the black heart.      |
| 1.1-1.4 | Experimental | 82 | Filler       | Shape   | Context  | Click on the blue rectangle.       |
| 1.1-1.4 | Experimental | 82 | Filler       | Shape   | Critical | Now click on the blue square.      |
| 1.1-1.4 | Experimental | 83 | Experimental | Color   | Context  | Click on the red rectangle.        |
| 1.1-1.4 | Experimental | 83 | Experimental | Color   | Critical | Now click on the purple rectangle. |
| 1.1-1.4 | Experimental | 84 | Experimental | Color   | Context  | Click on the red square.           |
| 1.1-1.4 | Experimental | 84 | Experimental | Color   | Critical | Now click on the white square.     |
| 1.1-1.4 | Experimental | 85 | Experimental | Both    | Context  | Click on the purple triangle.      |
| 1.1-1.4 | Experimental | 85 | Experimental | Both    | Critical | Now click on the green square.     |
| 1.1-1.4 | Experimental | 86 | Filler       | Neither | Context  | Click on the purple triangle.      |
| 1.1-1.4 | Experimental | 86 | Filler       | Neither | Critical | Now click on the purple triangle.  |

|         |              |     |              |         |          |                                   |
|---------|--------------|-----|--------------|---------|----------|-----------------------------------|
| 1.1-1.4 | Experimental | 87  | Filler       | Neither | Context  | Click on the blue rectangle.      |
| 1.1-1.4 | Experimental | 87  | Filler       | Neither | Critical | Now click on the blue rectangle.  |
| 1.1-1.4 | Experimental | 88  | Experimental | Both    | Context  | Click on the black square.        |
| 1.1-1.4 | Experimental | 88  | Experimental | Both    | Critical | Now click on the blue star.       |
| 1.1-1.4 | Experimental | 89  | Filler       | Neither | Context  | Click on the red star.            |
| 1.1-1.4 | Experimental | 89  | Filler       | Neither | Critical | Now click on the red star.        |
| 1.1-1.4 | Experimental | 90  | Filler       | Shape   | Context  | Click on the yellow rectangle.    |
| 1.1-1.4 | Experimental | 90  | Filler       | Shape   | Critical | Now click on the yellow star.     |
| 1.1-1.4 | Experimental | 91  | Filler       | Shape   | Context  | Click on the white oval.          |
| 1.1-1.4 | Experimental | 91  | Filler       | Shape   | Critical | Now click on the white square.    |
| 1.1-1.4 | Experimental | 92  | Experimental | Color   | Context  | Click on the green star.          |
| 1.1-1.4 | Experimental | 92  | Experimental | Color   | Critical | Now click on the black star.      |
| 1.1-1.4 | Experimental | 93  | Experimental | Both    | Context  | Click on the purple heart.        |
| 1.1-1.4 | Experimental | 93  | Experimental | Both    | Critical | Now click on the yellow oval.     |
| 1.1-1.4 | Experimental | 94  | Filler       | Neither | Context  | Click on the white diamond.       |
| 1.1-1.4 | Experimental | 94  | Filler       | Neither | Critical | Now click on the white diamond.   |
| 1.1-1.4 | Experimental | 95  | Filler       | Shape   | Context  | Click on the yellow square.       |
| 1.1-1.4 | Experimental | 95  | Filler       | Shape   | Critical | Now click on the yellow diamond.  |
| 1.1-1.4 | Experimental | 96  | Experimental | Both    | Context  | Click on the green star.          |
| 1.1-1.4 | Experimental | 96  | Experimental | Both    | Critical | Now click on the red diamond.     |
| 1.1-1.4 | Experimental | 97  | Filler       | Neither | Context  | Click on the blue circle.         |
| 1.1-1.4 | Experimental | 97  | Filler       | Neither | Critical | Now click on the blue circle.     |
| 1.1-1.4 | Experimental | 98  | Experimental | Both    | Context  | Click on the orange rectangle.    |
| 1.1-1.4 | Experimental | 98  | Experimental | Both    | Critical | Now click on the black circle.    |
| 1.1-1.4 | Experimental | 99  | Filler       | Shape   | Context  | Click on the purple star.         |
| 1.1-1.4 | Experimental | 99  | Filler       | Shape   | Critical | Now click on the purple circle.   |
| 1.1-1.4 | Experimental | 100 | Filler       | Shape   | Context  | Click on the white star.          |
| 1.1-1.4 | Experimental | 100 | Filler       | Shape   | Critical | Now click on the white oval.      |
| 1.1-1.4 | Experimental | 101 | Experimental | Both    | Context  | Click on the black heart.         |
| 1.1-1.4 | Experimental | 101 | Experimental | Both    | Critical | Now click on the orange triangle. |
| 1.1-1.4 | Experimental | 102 | Filler       | Neither | Context  | Click on the black oval.          |
| 1.1-1.4 | Experimental | 102 | Filler       | Neither | Critical | Now click on the black oval.      |

|         |              |     |              |         |          |                                   |
|---------|--------------|-----|--------------|---------|----------|-----------------------------------|
| 1.1-1.4 | Experimental | 103 | Experimental | Both    | Context  | Click on the orange oval.         |
| 1.1-1.4 | Experimental | 103 | Experimental | Both    | Critical | Now click on the purple star.     |
| 1.1-1.4 | Experimental | 104 | Filler       | Shape   | Context  | Click on the yellow triangle.     |
| 1.1-1.4 | Experimental | 104 | Filler       | Shape   | Critical | Now click on the yellow heart.    |
| 1.1-1.4 | Experimental | 105 | Filler       | Shape   | Context  | Click on the blue square.         |
| 1.1-1.4 | Experimental | 105 | Filler       | Shape   | Critical | Now click on the blue rectangle.  |
| 1.1-1.4 | Experimental | 106 | Filler       | Neither | Context  | Click on the purple square.       |
| 1.1-1.4 | Experimental | 106 | Filler       | Neither | Critical | Now click on the purple square.   |
| 1.1-1.4 | Experimental | 107 | Filler       | Neither | Context  | Click on the red heart.           |
| 1.1-1.4 | Experimental | 107 | Filler       | Neither | Critical | Now click on the red heart.       |
| 1.1-1.4 | Experimental | 108 | Experimental | Color   | Context  | Click on the white circle.        |
| 1.1-1.4 | Experimental | 108 | Experimental | Color   | Critical | Now click on the green circle.    |
| 1.1-1.4 | Experimental | 109 | Experimental | Color   | Context  | Click on the black diamond.       |
| 1.1-1.4 | Experimental | 109 | Experimental | Color   | Critical | Now click on the purple diamond.  |
| 1.1-1.4 | Experimental | 110 | Filler       | Neither | Context  | Click on the orange triangle.     |
| 1.1-1.4 | Experimental | 110 | Filler       | Neither | Critical | Now click on the orange triangle. |
| 1.1-1.4 | Experimental | 111 | Filler       | Shape   | Context  | Click on the red star.            |
| 1.1-1.4 | Experimental | 111 | Filler       | Shape   | Critical | Now click on the red diamond.     |
| 1.1-1.4 | Experimental | 112 | Experimental | Color   | Context  | Click on the red circle.          |
| 1.1-1.4 | Experimental | 112 | Experimental | Color   | Critical | Now click on the white circle.    |
| 1.1-1.4 | Experimental | 113 | Filler       | Neither | Context  | Click on the green rectangle.     |
| 1.1-1.4 | Experimental | 113 | Filler       | Neither | Critical | Now click on the green rectangle. |
| 1.1-1.4 | Experimental | 114 | Experimental | Color   | Context  | Click on the orange oval.         |
| 1.1-1.4 | Experimental | 114 | Experimental | Color   | Critical | Now click on the white oval.      |
| 1.1-1.4 | Experimental | 115 | Experimental | Color   | Context  | Click on the blue diamond.        |
| 1.1-1.4 | Experimental | 115 | Experimental | Color   | Critical | Now click on the red diamond.     |
| 1.1-1.4 | Experimental | 116 | Filler       | Neither | Context  | Click on the white star.          |
| 1.1-1.4 | Experimental | 116 | Filler       | Neither | Critical | Now click on the white star.      |
| 1.1-1.4 | Experimental | 117 | Experimental | Both    | Context  | Click on the blue oval.           |
| 1.1-1.4 | Experimental | 117 | Experimental | Both    | Critical | Now click on the yellow heart.    |
| 1.1-1.4 | Experimental | 118 | Experimental | Color   | Context  | Click on the blue square.         |
| 1.1-1.4 | Experimental | 118 | Experimental | Color   | Critical | Now click on the black square.    |



|         |              |     |              |         |          |                                   |
|---------|--------------|-----|--------------|---------|----------|-----------------------------------|
| 1.1-1.4 | Experimental | 119 | Filler       | Neither | Context  | Click on the yellow triangle.     |
| 1.1-1.4 | Experimental | 119 | Filler       | Neither | Critical | Now click on the yellow triangle. |
| 1.1-1.4 | Experimental | 120 | Experimental | Color   | Context  | Click on the purple rectangle.    |
| 1.1-1.4 | Experimental | 120 | Experimental | Color   | Critical | Now click on the green rectangle. |
| 1.1-1.4 | Experimental | 121 | Experimental | Both    | Context  | Click on the yellow heart.        |
| 1.1-1.4 | Experimental | 121 | Experimental | Both    | Critical | Now click on the purple diamond.  |
| 1.1-1.4 | Experimental | 122 | Filler       | Neither | Context  | Click on the black star.          |
| 1.1-1.4 | Experimental | 122 | Filler       | Neither | Critical | Now click on the black star.      |
| 1.1-1.4 | Experimental | 123 | Filler       | Shape   | Context  | Click on the black rectangle.     |
| 1.1-1.4 | Experimental | 123 | Filler       | Shape   | Critical | Now click on the black circle.    |
| 1.1-1.4 | Experimental | 124 | Experimental | Both    | Context  | Click on the red rectangle.       |
| 1.1-1.4 | Experimental | 124 | Experimental | Both    | Critical | Now click on the white square.    |
| 1.1-1.4 | Experimental | 125 | Filler       | Neither | Context  | Click on the red diamond.         |
| 1.1-1.4 | Experimental | 125 | Filler       | Neither | Critical | Now click on the red diamond.     |
| 1.1-1.4 | Experimental | 126 | Experimental | Color   | Context  | Click on the green rectangle.     |
| 1.1-1.4 | Experimental | 126 | Experimental | Color   | Critical | Now click on the blue rectangle.  |
| 1.1-1.4 | Experimental | 127 | Filler       | Shape   | Context  | Click on the green oval.          |
| 1.1-1.4 | Experimental | 127 | Filler       | Shape   | Critical | Now click on the green star.      |
| 1.1-1.4 | Experimental | 128 | Experimental | Both    | Context  | Click on the blue circle.         |
| 1.1-1.4 | Experimental | 128 | Experimental | Both    | Critical | Now click on the green rectangle. |
| 1.1-1.4 | Experimental | 129 | Experimental | Both    | Context  | Click on the red circle.          |
| 1.1-1.4 | Experimental | 129 | Experimental | Both    | Critical | Now click on the purple oval.     |
| 1.1-1.4 | Experimental | 130 | Experimental | Color   | Context  | Click on the red diamond.         |
| 1.1-1.4 | Experimental | 130 | Experimental | Color   | Critical | Now click on the yellow diamond.  |
| 1.1-1.4 | Experimental | 131 | Filler       | Shape   | Context  | Click on the orange star.         |
| 1.1-1.4 | Experimental | 131 | Filler       | Shape   | Critical | Now click on the orange oval.     |
| 1.1-1.4 | Experimental | 132 | Experimental | Color   | Context  | Click on the red oval.            |
| 1.1-1.4 | Experimental | 132 | Experimental | Color   | Critical | Now click on the black oval.      |
| 1.1-1.4 | Experimental | 133 | Experimental | Both    | Context  | Click on the yellow diamond.      |
| 1.1-1.4 | Experimental | 133 | Experimental | Both    | Critical | Now click on the orange heart.    |
| 1.1-1.4 | Experimental | 134 | Filler       | Neither | Context  | Click on the orange diamond.      |
| 1.1-1.4 | Experimental | 134 | Filler       | Neither | Critical | Now click on the orange diamond.  |

|         |              |     |              |         |          |                                    |
|---------|--------------|-----|--------------|---------|----------|------------------------------------|
| 1.1-1.4 | Experimental | 135 | Experimental | Color   | Context  | Click on the yellow rectangle.     |
| 1.1-1.4 | Experimental | 135 | Experimental | Color   | Critical | Now click on the orange rectangle. |
| 1.1-1.4 | Experimental | 136 | Experimental | Color   | Context  | Click on the green heart.          |
| 1.1-1.4 | Experimental | 136 | Experimental | Color   | Critical | Now click on the yellow heart.     |
| 1.1-1.4 | Experimental | 137 | Experimental | Both    | Context  | Click on the orange triangle.      |
| 1.1-1.4 | Experimental | 137 | Experimental | Both    | Critical | Now click on the white rectangle.  |
| 1.1-1.4 | Experimental | 138 | Experimental | Color   | Context  | Click on the black oval.           |
| 1.1-1.4 | Experimental | 138 | Experimental | Color   | Critical | Now click on the green oval.       |
| 1.1-1.4 | Experimental | 139 | Filler       | Neither | Context  | Click on the purple oval.          |
| 1.1-1.4 | Experimental | 139 | Filler       | Neither | Critical | Now click on the purple oval.      |
| 1.1-1.4 | Experimental | 140 | Filler       | Shape   | Context  | Click on the white rectangle.      |
| 1.1-1.4 | Experimental | 140 | Filler       | Shape   | Critical | Now click on the white circle.     |
| 1.1-1.4 | Experimental | 141 | Filler       | Shape   | Context  | Click on the black diamond.        |
| 1.1-1.4 | Experimental | 141 | Filler       | Shape   | Critical | Now click on the black triangle.   |
| 1.1-1.4 | Experimental | 142 | Experimental | Color   | Context  | Click on the purple diamond.       |
| 1.1-1.4 | Experimental | 142 | Experimental | Color   | Critical | Now click on the black diamond.    |
| 1.1-1.4 | Experimental | 143 | Filler       | Shape   | Context  | Click on the blue heart.           |
| 1.1-1.4 | Experimental | 143 | Filler       | Shape   | Critical | Now click on the blue triangle.    |
| 1.1-1.4 | Experimental | 144 | Filler       | Shape   | Context  | Click on the green triangle.       |
| 1.1-1.4 | Experimental | 144 | Filler       | Shape   | Critical | Now click on the green square.     |
| 1.1-1.4 | Experimental | 145 | Filler       | Neither | Context  | Click on the yellow heart.         |
| 1.1-1.4 | Experimental | 145 | Filler       | Neither | Critical | Now click on the yellow heart.     |
| 1.1-1.4 | Experimental | 146 | Filler       | Shape   | Context  | Click on the red heart.            |
| 1.1-1.4 | Experimental | 146 | Filler       | Shape   | Critical | Now click on the red oval.         |
| 1.1-1.4 | Experimental | 147 | Experimental | Color   | Context  | Click on the purple heart.         |
| 1.1-1.4 | Experimental | 147 | Experimental | Color   | Critical | Now click on the black heart.      |
| 1.1-1.4 | Experimental | 148 | Experimental | Both    | Context  | Click on the red triangle.         |
| 1.1-1.4 | Experimental | 148 | Experimental | Both    | Critical | Now click on the blue diamond.     |
| 1.1-1.4 | Experimental | 149 | Experimental | Both    | Context  | Click on the yellow star.          |
| 1.1-1.4 | Experimental | 149 | Experimental | Both    | Critical | Now click on the black rectangle.  |
| 1.1-1.4 | Experimental | 150 | Experimental | Color   | Context  | Click on the green square.         |
| 1.1-1.4 | Experimental | 150 | Experimental | Color   | Critical | Now click on the yellow square.    |

|         |              |     |              |         |          |                                   |
|---------|--------------|-----|--------------|---------|----------|-----------------------------------|
| 1.1-1.4 | Experimental | 151 | Experimental | Color   | Context  | Click on the orange triangle.     |
| 1.1-1.4 | Experimental | 151 | Experimental | Color   | Critical | Now click on the blue triangle.   |
| 1.1-1.4 | Experimental | 152 | Experimental | Both    | Context  | Click on the green circle.        |
| 1.1-1.4 | Experimental | 152 | Experimental | Both    | Critical | Now click on the red star.        |
| 1.1-1.4 | Experimental | 153 | Filler       | Neither | Context  | Click on the white rectangle.     |
| 1.1-1.4 | Experimental | 153 | Filler       | Neither | Critical | Now click on the white rectangle. |
| 1.1-1.4 | Experimental | 154 | Experimental | Both    | Context  | Click on the purple diamond.      |
| 1.1-1.4 | Experimental | 154 | Experimental | Both    | Critical | Now click on the red rectangle.   |
| 1.1-1.4 | Experimental | 155 | Filler       | Shape   | Context  | Click on the purple heart.        |
| 1.1-1.4 | Experimental | 155 | Filler       | Shape   | Critical | Now click on the purple star.     |
| 1.1-1.4 | Experimental | 156 | Experimental | Color   | Context  | Click on the orange square.       |
| 1.1-1.4 | Experimental | 156 | Experimental | Color   | Critical | Now click on the red square.      |
| 1.1-1.4 | Experimental | 157 | Filler       | Neither | Context  | Click on the blue triangle.       |
| 1.1-1.4 | Experimental | 157 | Filler       | Neither | Critical | Now click on the blue triangle.   |
| 1.1-1.4 | Experimental | 158 | Filler       | Neither | Context  | Click on the green circle.        |
| 1.1-1.4 | Experimental | 158 | Filler       | Neither | Critical | Now click on the green circle.    |
| 1.1-1.4 | Experimental | 159 | Filler       | Shape   | Context  | Click on the orange diamond.      |
| 1.1-1.4 | Experimental | 159 | Filler       | Shape   | Critical | Now click on the orange circle.   |
| 1.1-1.4 | Experimental | 160 | Experimental | Both    | Context  | Click on the black square.        |
| 1.1-1.4 | Experimental | 160 | Experimental | Both    | Critical | Now click on the yellow circle.   |
| 2.1-2.4 | Practice     | 1   | Experimental | Both    | Context  | Click on the white triangle.      |
| 2.1-2.4 | Practice     | 1   | Experimental | Both    | Critical | Now click on the purple star.     |
| 2.1-2.4 | Practice     | 2   | Filler       | Neither | Context  | Click on the black oval.          |
| 2.1-2.4 | Practice     | 2   | Filler       | Neither | Critical | Now click on the black oval.      |
| 2.1-2.4 | Practice     | 3   | Filler       | Shape   | Context  | Click on the blue star.           |
| 2.1-2.4 | Practice     | 3   | Filler       | Shape   | Critical | Now click on the blue square.     |
| 2.1-2.4 | Practice     | 4   | Filler       | Neither | Context  | Click on the white rectangle.     |
| 2.1-2.4 | Practice     | 4   | Filler       | Neither | Critical | Now click on the white rectangle. |
| 2.1-2.4 | Practice     | 5   | Experimental | Color   | Context  | Click on the red heart.           |
| 2.1-2.4 | Practice     | 5   | Experimental | Color   | Critical | Now click on the orange heart.    |
| 2.1-2.4 | Practice     | 6   | Experimental | Both    | Context  | Click on the orange diamond.      |
| 2.1-2.4 | Practice     | 6   | Experimental | Both    | Critical | Now click on the green triangle.  |

|         |              |    |              |         |          |                                    |
|---------|--------------|----|--------------|---------|----------|------------------------------------|
| 2.1-2.4 | Practice     | 7  | Filler       | Shape   | Context  | Click on the yellow oval.          |
| 2.1-2.4 | Practice     | 7  | Filler       | Shape   | Critical | Now click on the yellow diamond.   |
| 2.1-2.4 | Practice     | 8  | Experimental | Color   | Context  | Click on the purple circle.        |
| 2.1-2.4 | Practice     | 8  | Experimental | Color   | Critical | Now click on the red circle.       |
| 2.1-2.4 | Experimental | 1  | Experimental | Both    | Context  | Click on the blue triangle.        |
| 2.1-2.4 | Experimental | 1  | Experimental | Both    | Critical | Now click on the white star.       |
| 2.1-2.4 | Experimental | 2  | Experimental | Color   | Context  | Click on the yellow oval.          |
| 2.1-2.4 | Experimental | 2  | Experimental | Color   | Critical | Now click on the green oval.       |
| 2.1-2.4 | Experimental | 3  | Filler       | Neither | Context  | Click on the white star.           |
| 2.1-2.4 | Experimental | 3  | Filler       | Neither | Critical | Now click on the white star.       |
| 2.1-2.4 | Experimental | 4  | Experimental | Color   | Context  | Click on the purple heart.         |
| 2.1-2.4 | Experimental | 4  | Experimental | Color   | Critical | Now click on the white heart.      |
| 2.1-2.4 | Experimental | 5  | Experimental | Color   | Context  | Click on the yellow triangle.      |
| 2.1-2.4 | Experimental | 5  | Experimental | Color   | Critical | Now click on the blue triangle.    |
| 2.1-2.4 | Experimental | 6  | Filler       | Shape   | Context  | Click on the yellow circle.        |
| 2.1-2.4 | Experimental | 6  | Filler       | Shape   | Critical | Now click on the yellow square.    |
| 2.1-2.4 | Experimental | 7  | Filler       | Shape   | Context  | Click on the black diamond.        |
| 2.1-2.4 | Experimental | 7  | Filler       | Shape   | Critical | Now click on the black rectangle.  |
| 2.1-2.4 | Experimental | 8  | Filler       | Neither | Context  | Click on the black diamond.        |
| 2.1-2.4 | Experimental | 8  | Filler       | Neither | Critical | Now click on the black diamond.    |
| 2.1-2.4 | Experimental | 9  | Experimental | Both    | Context  | Click on the red square.           |
| 2.1-2.4 | Experimental | 9  | Experimental | Both    | Critical | Now click on the orange triangle.  |
| 2.1-2.4 | Experimental | 10 | Filler       | Shape   | Context  | Click on the white circle.         |
| 2.1-2.4 | Experimental | 10 | Filler       | Shape   | Critical | Now click on the white oval.       |
| 2.1-2.4 | Experimental | 11 | Experimental | Both    | Context  | Click on the purple diamond.       |
| 2.1-2.4 | Experimental | 11 | Experimental | Both    | Critical | Now click on the red star.         |
| 2.1-2.4 | Experimental | 12 | Filler       | Neither | Context  | Click on the yellow circle.        |
| 2.1-2.4 | Experimental | 12 | Filler       | Neither | Critical | Now click on the yellow circle.    |
| 2.1-2.4 | Experimental | 13 | Experimental | Both    | Context  | Click on the yellow circle.        |
| 2.1-2.4 | Experimental | 13 | Experimental | Both    | Critical | Now click on the purple star.      |
| 2.1-2.4 | Experimental | 14 | Experimental | Color   | Context  | Click on the white rectangle.      |
| 2.1-2.4 | Experimental | 14 | Experimental | Color   | Critical | Now click on the orange rectangle. |

|         |              |    |              |         |          |                                  |
|---------|--------------|----|--------------|---------|----------|----------------------------------|
| 2.1-2.4 | Experimental | 15 | Filler       | Neither | Context  | Click on the purple diamond.     |
| 2.1-2.4 | Experimental | 15 | Filler       | Neither | Critical | Now click on the purple diamond. |
| 2.1-2.4 | Experimental | 16 | Filler       | Neither | Context  | Click on the green diamond.      |
| 2.1-2.4 | Experimental | 16 | Filler       | Neither | Critical | Now click on the green diamond.  |
| 2.1-2.4 | Experimental | 17 | Filler       | Shape   | Context  | Click on the red heart.          |
| 2.1-2.4 | Experimental | 17 | Filler       | Shape   | Critical | Now click on the red circle.     |
| 2.1-2.4 | Experimental | 18 | Experimental | Both    | Context  | Click on the green rectangle.    |
| 2.1-2.4 | Experimental | 18 | Experimental | Both    | Critical | Now click on the orange oval.    |
| 2.1-2.4 | Experimental | 19 | Experimental | Both    | Context  | Click on the yellow square.      |
| 2.1-2.4 | Experimental | 19 | Experimental | Both    | Critical | Now click on the orange circle.  |
| 2.1-2.4 | Experimental | 20 | Filler       | Shape   | Context  | Click on the green star.         |
| 2.1-2.4 | Experimental | 20 | Filler       | Shape   | Critical | Now click on the green square.   |
| 2.1-2.4 | Experimental | 21 | Filler       | Neither | Context  | Click on the blue heart.         |
| 2.1-2.4 | Experimental | 21 | Filler       | Neither | Critical | Now click on the blue heart.     |
| 2.1-2.4 | Experimental | 22 | Experimental | Both    | Context  | Click on the black star.         |
| 2.1-2.4 | Experimental | 22 | Experimental | Both    | Critical | Now click on the red rectangle.  |
| 2.1-2.4 | Experimental | 23 | Filler       | Neither | Context  | Click on the orange square.      |
| 2.1-2.4 | Experimental | 23 | Filler       | Neither | Critical | Now click on the orange square.  |
| 2.1-2.4 | Experimental | 24 | Filler       | Shape   | Context  | Click on the blue circle.        |
| 2.1-2.4 | Experimental | 24 | Filler       | Shape   | Critical | Now click on the blue diamond.   |
| 2.1-2.4 | Experimental | 25 | Experimental | Color   | Context  | Click on the white square.       |
| 2.1-2.4 | Experimental | 25 | Experimental | Color   | Critical | Now click on the yellow square.  |
| 2.1-2.4 | Experimental | 26 | Filler       | Neither | Context  | Click on the red rectangle.      |
| 2.1-2.4 | Experimental | 26 | Filler       | Neither | Critical | Now click on the red rectangle.  |
| 2.1-2.4 | Experimental | 27 | Filler       | Shape   | Context  | Click on the orange triangle.    |
| 2.1-2.4 | Experimental | 27 | Filler       | Shape   | Critical | Now click on the orange star.    |
| 2.1-2.4 | Experimental | 28 | Filler       | Shape   | Context  | Click on the purple diamond.     |
| 2.1-2.4 | Experimental | 28 | Filler       | Shape   | Critical | Now click on the purple heart.   |
| 2.1-2.4 | Experimental | 29 | Experimental | Color   | Context  | Click on the orange oval.        |
| 2.1-2.4 | Experimental | 29 | Experimental | Color   | Critical | Now click on the red oval.       |
| 2.1-2.4 | Experimental | 30 | Experimental | Color   | Context  | Click on the black circle.       |
| 2.1-2.4 | Experimental | 30 | Experimental | Color   | Critical | Now click on the red circle.     |

|         |              |    |              |         |          |                                    |
|---------|--------------|----|--------------|---------|----------|------------------------------------|
| 2.1-2.4 | Experimental | 31 | Experimental | Color   | Context  | Click on the blue star.            |
| 2.1-2.4 | Experimental | 31 | Experimental | Color   | Critical | Now click on the orange star.      |
| 2.1-2.4 | Experimental | 32 | Experimental | Both    | Context  | Click on the orange heart.         |
| 2.1-2.4 | Experimental | 32 | Experimental | Both    | Critical | Now click on the blue diamond.     |
| 2.1-2.4 | Experimental | 33 | Filler       | Shape   | Context  | Click on the orange diamond.       |
| 2.1-2.4 | Experimental | 33 | Filler       | Shape   | Critical | Now click on the orange square.    |
| 2.1-2.4 | Experimental | 34 | Experimental | Color   | Context  | Click on the white star.           |
| 2.1-2.4 | Experimental | 34 | Experimental | Color   | Critical | Now click on the black star.       |
| 2.1-2.4 | Experimental | 35 | Filler       | Neither | Context  | Click on the purple rectangle.     |
| 2.1-2.4 | Experimental | 35 | Filler       | Neither | Critical | Now click on the purple rectangle. |
| 2.1-2.4 | Experimental | 36 | Filler       | Shape   | Context  | Click on the yellow heart.         |
| 2.1-2.4 | Experimental | 36 | Filler       | Shape   | Critical | Now click on the yellow diamond.   |
| 2.1-2.4 | Experimental | 37 | Filler       | Shape   | Context  | Click on the green triangle.       |
| 2.1-2.4 | Experimental | 37 | Filler       | Shape   | Critical | Now click on the green oval.       |
| 2.1-2.4 | Experimental | 38 | Experimental | Both    | Context  | Click on the black rectangle.      |
| 2.1-2.4 | Experimental | 38 | Experimental | Both    | Critical | Now click on the red triangle.     |
| 2.1-2.4 | Experimental | 39 | Filler       | Neither | Context  | Click on the yellow rectangle.     |
| 2.1-2.4 | Experimental | 39 | Filler       | Neither | Critical | Now click on the yellow rectangle. |
| 2.1-2.4 | Experimental | 40 | Filler       | Shape   | Context  | Click on the black square.         |
| 2.1-2.4 | Experimental | 40 | Filler       | Shape   | Critical | Now click on the black circle.     |
| 2.1-2.4 | Experimental | 41 | Filler       | Neither | Context  | Click on the black square.         |
| 2.1-2.4 | Experimental | 41 | Filler       | Neither | Critical | Now click on the black square.     |
| 2.1-2.4 | Experimental | 42 | Experimental | Both    | Context  | Click on the white square.         |
| 2.1-2.4 | Experimental | 42 | Experimental | Both    | Critical | Now click on the green heart.      |
| 2.1-2.4 | Experimental | 43 | Experimental | Color   | Context  | Click on the red triangle.         |
| 2.1-2.4 | Experimental | 43 | Experimental | Color   | Critical | Now click on the white triangle.   |
| 2.1-2.4 | Experimental | 44 | Filler       | Shape   | Context  | Click on the purple circle.        |
| 2.1-2.4 | Experimental | 44 | Filler       | Shape   | Critical | Now click on the purple rectangle. |
| 2.1-2.4 | Experimental | 45 | Experimental | Both    | Context  | Click on the green heart.          |
| 2.1-2.4 | Experimental | 45 | Experimental | Both    | Critical | Now click on the purple triangle.  |
| 2.1-2.4 | Experimental | 46 | Experimental | Color   | Context  | Click on the green square.         |
| 2.1-2.4 | Experimental | 46 | Experimental | Color   | Critical | Now click on the black square.     |

|         |              |    |              |         |          |                                   |
|---------|--------------|----|--------------|---------|----------|-----------------------------------|
| 2.1-2.4 | Experimental | 47 | Filler       | Shape   | Context  | Click on the blue rectangle.      |
| 2.1-2.4 | Experimental | 47 | Filler       | Shape   | Critical | Now click on the blue star.       |
| 2.1-2.4 | Experimental | 48 | Experimental | Both    | Context  | Click on the blue heart.          |
| 2.1-2.4 | Experimental | 48 | Experimental | Both    | Critical | Now click on the yellow circle.   |
| 2.1-2.4 | Experimental | 49 | Filler       | Neither | Context  | Click on the red triangle.        |
| 2.1-2.4 | Experimental | 49 | Filler       | Neither | Critical | Now click on the red triangle.    |
| 2.1-2.4 | Experimental | 50 | Experimental | Both    | Context  | Click on the purple square.       |
| 2.1-2.4 | Experimental | 50 | Experimental | Both    | Critical | Now click on the blue circle.     |
| 2.1-2.4 | Experimental | 51 | Filler       | Shape   | Context  | Click on the red triangle.        |
| 2.1-2.4 | Experimental | 51 | Filler       | Shape   | Critical | Now click on the red square.      |
| 2.1-2.4 | Experimental | 52 | Experimental | Both    | Context  | Click on the yellow oval.         |
| 2.1-2.4 | Experimental | 52 | Experimental | Both    | Critical | Now click on the orange heart.    |
| 2.1-2.4 | Experimental | 53 | Experimental | Color   | Context  | Click on the red heart.           |
| 2.1-2.4 | Experimental | 53 | Experimental | Color   | Critical | Now click on the green heart.     |
| 2.1-2.4 | Experimental | 54 | Filler       | Neither | Context  | Click on the black heart.         |
| 2.1-2.4 | Experimental | 54 | Filler       | Neither | Critical | Now click on the black heart.     |
| 2.1-2.4 | Experimental | 55 | Filler       | Neither | Context  | Click on the orange heart.        |
| 2.1-2.4 | Experimental | 55 | Filler       | Neither | Critical | Now click on the orange heart.    |
| 2.1-2.4 | Experimental | 56 | Filler       | Shape   | Context  | Click on the white circle.        |
| 2.1-2.4 | Experimental | 56 | Filler       | Shape   | Critical | Now click on the white heart.     |
| 2.1-2.4 | Experimental | 57 | Filler       | Neither | Context  | Click on the green heart.         |
| 2.1-2.4 | Experimental | 57 | Filler       | Neither | Critical | Now click on the green heart.     |
| 2.1-2.4 | Experimental | 58 | Filler       | Shape   | Context  | Click on the orange oval.         |
| 2.1-2.4 | Experimental | 58 | Filler       | Shape   | Critical | Now click on the orange circle.   |
| 2.1-2.4 | Experimental | 59 | Filler       | Shape   | Context  | Click on the yellow diamond.      |
| 2.1-2.4 | Experimental | 59 | Filler       | Shape   | Critical | Now click on the yellow oval.     |
| 2.1-2.4 | Experimental | 60 | Experimental | Color   | Context  | Click on the blue triangle.       |
| 2.1-2.4 | Experimental | 60 | Experimental | Color   | Critical | Now click on the yellow triangle. |
| 2.1-2.4 | Experimental | 61 | Experimental | Both    | Context  | Click on the yellow heart.        |
| 2.1-2.4 | Experimental | 61 | Experimental | Both    | Critical | Now click on the blue oval.       |
| 2.1-2.4 | Experimental | 62 | Experimental | Both    | Context  | Click on the blue circle.         |
| 2.1-2.4 | Experimental | 62 | Experimental | Both    | Critical | Now click on the yellow triangle. |

|         |              |    |              |         |          |                                    |
|---------|--------------|----|--------------|---------|----------|------------------------------------|
| 2.1-2.4 | Experimental | 63 | Filler       | Neither | Context  | Click on the white triangle.       |
| 2.1-2.4 | Experimental | 63 | Filler       | Neither | Critical | Now click on the white triangle.   |
| 2.1-2.4 | Experimental | 64 | Filler       | Shape   | Context  | Click on the green oval.           |
| 2.1-2.4 | Experimental | 64 | Filler       | Shape   | Critical | Now click on the green triangle.   |
| 2.1-2.4 | Experimental | 65 | Experimental | Color   | Context  | Click on the green circle.         |
| 2.1-2.4 | Experimental | 65 | Experimental | Color   | Critical | Now click on the blue circle.      |
| 2.1-2.4 | Experimental | 66 | Experimental | Color   | Context  | Click on the white diamond.        |
| 2.1-2.4 | Experimental | 66 | Experimental | Color   | Critical | Now click on the orange diamond.   |
| 2.1-2.4 | Experimental | 67 | Experimental | Color   | Context  | Click on the white heart.          |
| 2.1-2.4 | Experimental | 67 | Experimental | Color   | Critical | Now click on the purple heart.     |
| 2.1-2.4 | Experimental | 68 | Filler       | Neither | Context  | Click on the orange rectangle.     |
| 2.1-2.4 | Experimental | 68 | Filler       | Neither | Critical | Now click on the orange rectangle. |
| 2.1-2.4 | Experimental | 69 | Experimental | Both    | Context  | Click on the white oval.           |
| 2.1-2.4 | Experimental | 69 | Experimental | Both    | Critical | Now click on the green star.       |
| 2.1-2.4 | Experimental | 70 | Experimental | Color   | Context  | Click on the green oval.           |
| 2.1-2.4 | Experimental | 70 | Experimental | Color   | Critical | Now click on the black oval.       |
| 2.1-2.4 | Experimental | 71 | Experimental | Color   | Context  | Click on the purple triangle.      |
| 2.1-2.4 | Experimental | 71 | Experimental | Color   | Critical | Now click on the green triangle.   |
| 2.1-2.4 | Experimental | 72 | Filler       | Neither | Context  | Click on the green oval.           |
| 2.1-2.4 | Experimental | 72 | Filler       | Neither | Critical | Now click on the green oval.       |
| 2.1-2.4 | Experimental | 73 | Experimental | Both    | Context  | Click on the black oval.           |
| 2.1-2.4 | Experimental | 73 | Experimental | Both    | Critical | Now click on the white heart.      |
| 2.1-2.4 | Experimental | 74 | Experimental | Color   | Context  | Click on the black diamond.        |
| 2.1-2.4 | Experimental | 74 | Experimental | Color   | Critical | Now click on the white diamond.    |
| 2.1-2.4 | Experimental | 75 | Filler       | Neither | Context  | Click on the blue oval.            |
| 2.1-2.4 | Experimental | 75 | Filler       | Neither | Critical | Now click on the blue oval.        |
| 2.1-2.4 | Experimental | 76 | Experimental | Color   | Context  | Click on the blue circle.          |
| 2.1-2.4 | Experimental | 76 | Experimental | Color   | Critical | Now click on the purple circle.    |
| 2.1-2.4 | Experimental | 77 | Filler       | Neither | Context  | Click on the black triangle.       |
| 2.1-2.4 | Experimental | 77 | Filler       | Neither | Critical | Now click on the black triangle.   |
| 2.1-2.4 | Experimental | 78 | Experimental | Both    | Context  | Click on the white heart.          |
| 2.1-2.4 | Experimental | 78 | Experimental | Both    | Critical | Now click on the purple square.    |



|         |              |    |              |         |          |                                    |
|---------|--------------|----|--------------|---------|----------|------------------------------------|
| 2.1-2.4 | Experimental | 79 | Experimental | Color   | Context  | Click on the orange square.        |
| 2.1-2.4 | Experimental | 79 | Experimental | Color   | Critical | Now click on the blue square.      |
| 2.1-2.4 | Experimental | 80 | Filler       | Neither | Context  | Click on the red star.             |
| 2.1-2.4 | Experimental | 80 | Filler       | Neither | Critical | Now click on the red star.         |
| 2.1-2.4 | Experimental | 81 | Filler       | Shape   | Context  | Click on the black oval.           |
| 2.1-2.4 | Experimental | 81 | Filler       | Shape   | Critical | Now click on the black heart.      |
| 2.1-2.4 | Experimental | 82 | Filler       | Neither | Context  | Click on the blue square.          |
| 2.1-2.4 | Experimental | 82 | Filler       | Neither | Critical | Now click on the blue square.      |
| 2.1-2.4 | Experimental | 83 | Experimental | Both    | Context  | Click on the white diamond.        |
| 2.1-2.4 | Experimental | 83 | Experimental | Both    | Critical | Now click on the purple rectangle. |
| 2.1-2.4 | Experimental | 84 | Experimental | Both    | Context  | Click on the red star.             |
| 2.1-2.4 | Experimental | 84 | Experimental | Both    | Critical | Now click on the white square.     |
| 2.1-2.4 | Experimental | 85 | Experimental | Color   | Context  | Click on the purple square.        |
| 2.1-2.4 | Experimental | 85 | Experimental | Color   | Critical | Now click on the green square.     |
| 2.1-2.4 | Experimental | 86 | Filler       | Shape   | Context  | Click on the purple rectangle.     |
| 2.1-2.4 | Experimental | 86 | Filler       | Shape   | Critical | Now click on the purple triangle.  |
| 2.1-2.4 | Experimental | 87 | Filler       | Shape   | Context  | Click on the blue triangle.        |
| 2.1-2.4 | Experimental | 87 | Filler       | Shape   | Critical | Now click on the blue rectangle.   |
| 2.1-2.4 | Experimental | 88 | Experimental | Color   | Context  | Click on the black star.           |
| 2.1-2.4 | Experimental | 88 | Experimental | Color   | Critical | Now click on the blue star.        |
| 2.1-2.4 | Experimental | 89 | Filler       | Shape   | Context  | Click on the red rectangle.        |
| 2.1-2.4 | Experimental | 89 | Filler       | Shape   | Critical | Now click on the red star.         |
| 2.1-2.4 | Experimental | 90 | Filler       | Neither | Context  | Click on the yellow star.          |
| 2.1-2.4 | Experimental | 90 | Filler       | Neither | Critical | Now click on the yellow star.      |
| 2.1-2.4 | Experimental | 91 | Filler       | Neither | Context  | Click on the white square.         |
| 2.1-2.4 | Experimental | 91 | Filler       | Neither | Critical | Now click on the white square.     |
| 2.1-2.4 | Experimental | 92 | Experimental | Both    | Context  | Click on the green square.         |
| 2.1-2.4 | Experimental | 92 | Experimental | Both    | Critical | Now click on the black star.       |
| 2.1-2.4 | Experimental | 93 | Experimental | Color   | Context  | Click on the purple oval.          |
| 2.1-2.4 | Experimental | 93 | Experimental | Color   | Critical | Now click on the yellow oval.      |
| 2.1-2.4 | Experimental | 94 | Filler       | Shape   | Context  | Click on the white oval.           |
| 2.1-2.4 | Experimental | 94 | Filler       | Shape   | Critical | Now click on the white diamond.    |

|         |              |     |              |         |          |                                   |
|---------|--------------|-----|--------------|---------|----------|-----------------------------------|
| 2.1-2.4 | Experimental | 95  | Filler       | Neither | Context  | Click on the yellow diamond.      |
| 2.1-2.4 | Experimental | 95  | Filler       | Neither | Critical | Now click on the yellow diamond.  |
| 2.1-2.4 | Experimental | 96  | Experimental | Color   | Context  | Click on the green diamond.       |
| 2.1-2.4 | Experimental | 96  | Experimental | Color   | Critical | Now click on the red diamond.     |
| 2.1-2.4 | Experimental | 97  | Filler       | Shape   | Context  | Click on the blue square.         |
| 2.1-2.4 | Experimental | 97  | Filler       | Shape   | Critical | Now click on the blue circle.     |
| 2.1-2.4 | Experimental | 98  | Experimental | Color   | Context  | Click on the orange circle.       |
| 2.1-2.4 | Experimental | 98  | Experimental | Color   | Critical | Now click on the black circle.    |
| 2.1-2.4 | Experimental | 99  | Filler       | Neither | Context  | Click on the purple circle.       |
| 2.1-2.4 | Experimental | 99  | Filler       | Neither | Critical | Now click on the purple circle.   |
| 2.1-2.4 | Experimental | 100 | Filler       | Neither | Context  | Click on the white oval.          |
| 2.1-2.4 | Experimental | 100 | Filler       | Neither | Critical | Now click on the white oval.      |
| 2.1-2.4 | Experimental | 101 | Experimental | Color   | Context  | Click on the black triangle.      |
| 2.1-2.4 | Experimental | 101 | Experimental | Color   | Critical | Now click on the orange triangle. |
| 2.1-2.4 | Experimental | 102 | Filler       | Shape   | Context  | Click on the black star.          |
| 2.1-2.4 | Experimental | 102 | Filler       | Shape   | Critical | Now click on the black oval.      |
| 2.1-2.4 | Experimental | 103 | Experimental | Color   | Context  | Click on the orange star.         |
| 2.1-2.4 | Experimental | 103 | Experimental | Color   | Critical | Now click on the purple star.     |
| 2.1-2.4 | Experimental | 104 | Filler       | Neither | Context  | Click on the yellow heart.        |
| 2.1-2.4 | Experimental | 104 | Filler       | Neither | Critical | Now click on the yellow heart.    |
| 2.1-2.4 | Experimental | 105 | Filler       | Neither | Context  | Click on the blue rectangle.      |
| 2.1-2.4 | Experimental | 105 | Filler       | Neither | Critical | Now click on the blue rectangle.  |
| 2.1-2.4 | Experimental | 106 | Filler       | Shape   | Context  | Click on the purple triangle.     |
| 2.1-2.4 | Experimental | 106 | Filler       | Shape   | Critical | Now click on the purple square.   |
| 2.1-2.4 | Experimental | 107 | Filler       | Shape   | Context  | Click on the red square.          |
| 2.1-2.4 | Experimental | 107 | Filler       | Shape   | Critical | Now click on the red heart.       |
| 2.1-2.4 | Experimental | 108 | Experimental | Both    | Context  | Click on the white triangle.      |
| 2.1-2.4 | Experimental | 108 | Experimental | Both    | Critical | Now click on the green circle.    |
| 2.1-2.4 | Experimental | 109 | Experimental | Both    | Context  | Click on the black triangle.      |
| 2.1-2.4 | Experimental | 109 | Experimental | Both    | Critical | Now click on the purple diamond.  |
| 2.1-2.4 | Experimental | 110 | Filler       | Shape   | Context  | Click on the orange square.       |
| 2.1-2.4 | Experimental | 110 | Filler       | Shape   | Critical | Now click on the orange triangle. |

|         |              |     |              |         |          |                                   |
|---------|--------------|-----|--------------|---------|----------|-----------------------------------|
| 2.1-2.4 | Experimental | 111 | Filler       | Neither | Context  | Click on the red diamond.         |
| 2.1-2.4 | Experimental | 111 | Filler       | Neither | Critical | Now click on the red diamond.     |
| 2.1-2.4 | Experimental | 112 | Experimental | Both    | Context  | Click on the red rectangle.       |
| 2.1-2.4 | Experimental | 112 | Experimental | Both    | Critical | Now click on the white circle.    |
| 2.1-2.4 | Experimental | 113 | Filler       | Shape   | Context  | Click on the green heart.         |
| 2.1-2.4 | Experimental | 113 | Filler       | Shape   | Critical | Now click on the green rectangle. |
| 2.1-2.4 | Experimental | 114 | Experimental | Both    | Context  | Click on the orange rectangle.    |
| 2.1-2.4 | Experimental | 114 | Experimental | Both    | Critical | Now click on the white oval.      |
| 2.1-2.4 | Experimental | 115 | Experimental | Both    | Context  | Click on the blue star.           |
| 2.1-2.4 | Experimental | 115 | Experimental | Both    | Critical | Now click on the red diamond.     |
| 2.1-2.4 | Experimental | 116 | Filler       | Shape   | Context  | Click on the white rectangle.     |
| 2.1-2.4 | Experimental | 116 | Filler       | Shape   | Critical | Now click on the white star.      |
| 2.1-2.4 | Experimental | 117 | Experimental | Color   | Context  | Click on the blue heart.          |
| 2.1-2.4 | Experimental | 117 | Experimental | Color   | Critical | Now click on the yellow heart.    |
| 2.1-2.4 | Experimental | 118 | Experimental | Both    | Context  | Click on the blue diamond.        |
| 2.1-2.4 | Experimental | 118 | Experimental | Both    | Critical | Now click on the black square.    |
| 2.1-2.4 | Experimental | 119 | Filler       | Shape   | Context  | Click on the yellow oval.         |
| 2.1-2.4 | Experimental | 119 | Filler       | Shape   | Critical | Now click on the yellow triangle. |
| 2.1-2.4 | Experimental | 120 | Experimental | Both    | Context  | Click on the purple circle.       |
| 2.1-2.4 | Experimental | 120 | Experimental | Both    | Critical | Now click on the green rectangle. |
| 2.1-2.4 | Experimental | 121 | Experimental | Color   | Context  | Click on the yellow diamond.      |
| 2.1-2.4 | Experimental | 121 | Experimental | Color   | Critical | Now click on the purple diamond.  |
| 2.1-2.4 | Experimental | 122 | Filler       | Shape   | Context  | Click on the black circle.        |
| 2.1-2.4 | Experimental | 122 | Filler       | Shape   | Critical | Now click on the black star.      |
| 2.1-2.4 | Experimental | 123 | Filler       | Neither | Context  | Click on the black circle.        |
| 2.1-2.4 | Experimental | 123 | Filler       | Neither | Critical | Now click on the black circle.    |
| 2.1-2.4 | Experimental | 124 | Experimental | Color   | Context  | Click on the red square.          |
| 2.1-2.4 | Experimental | 124 | Experimental | Color   | Critical | Now click on the white square.    |
| 2.1-2.4 | Experimental | 125 | Filler       | Shape   | Context  | Click on the red star.            |
| 2.1-2.4 | Experimental | 125 | Filler       | Shape   | Critical | Now click on the red diamond.     |
| 2.1-2.4 | Experimental | 126 | Experimental | Both    | Context  | Click on the green oval.          |
| 2.1-2.4 | Experimental | 126 | Experimental | Both    | Critical | Now click on the blue rectangle.  |

|         |              |     |              |         |          |                                    |
|---------|--------------|-----|--------------|---------|----------|------------------------------------|
| 2.1-2.4 | Experimental | 127 | Filler       | Neither | Context  | Click on the green star.           |
| 2.1-2.4 | Experimental | 127 | Filler       | Neither | Critical | Now click on the green star.       |
| 2.1-2.4 | Experimental | 128 | Experimental | Color   | Context  | Click on the blue rectangle.       |
| 2.1-2.4 | Experimental | 128 | Experimental | Color   | Critical | Now click on the green rectangle.  |
| 2.1-2.4 | Experimental | 129 | Experimental | Color   | Context  | Click on the red oval.             |
| 2.1-2.4 | Experimental | 129 | Experimental | Color   | Critical | Now click on the purple oval.      |
| 2.1-2.4 | Experimental | 130 | Experimental | Both    | Context  | Click on the red oval.             |
| 2.1-2.4 | Experimental | 130 | Experimental | Both    | Critical | Now click on the yellow diamond.   |
| 2.1-2.4 | Experimental | 131 | Filler       | Neither | Context  | Click on the orange oval.          |
| 2.1-2.4 | Experimental | 131 | Filler       | Neither | Critical | Now click on the orange oval.      |
| 2.1-2.4 | Experimental | 132 | Experimental | Both    | Context  | Click on the red circle.           |
| 2.1-2.4 | Experimental | 132 | Experimental | Both    | Critical | Now click on the black oval.       |
| 2.1-2.4 | Experimental | 133 | Experimental | Color   | Context  | Click on the yellow heart.         |
| 2.1-2.4 | Experimental | 133 | Experimental | Color   | Critical | Now click on the orange heart.     |
| 2.1-2.4 | Experimental | 134 | Filler       | Shape   | Context  | Click on the orange triangle.      |
| 2.1-2.4 | Experimental | 134 | Filler       | Shape   | Critical | Now click on the orange diamond.   |
| 2.1-2.4 | Experimental | 135 | Experimental | Both    | Context  | Click on the yellow triangle.      |
| 2.1-2.4 | Experimental | 135 | Experimental | Both    | Critical | Now click on the orange rectangle. |
| 2.1-2.4 | Experimental | 136 | Experimental | Both    | Context  | Click on the green diamond.        |
| 2.1-2.4 | Experimental | 136 | Experimental | Both    | Critical | Now click on the yellow heart.     |
| 2.1-2.4 | Experimental | 137 | Experimental | Color   | Context  | Click on the orange rectangle.     |
| 2.1-2.4 | Experimental | 137 | Experimental | Color   | Critical | Now click on the white rectangle.  |
| 2.1-2.4 | Experimental | 138 | Experimental | Both    | Context  | Click on the black circle.         |
| 2.1-2.4 | Experimental | 138 | Experimental | Both    | Critical | Now click on the green oval.       |
| 2.1-2.4 | Experimental | 139 | Filler       | Shape   | Context  | Click on the purple heart.         |
| 2.1-2.4 | Experimental | 139 | Filler       | Shape   | Critical | Now click on the purple oval.      |
| 2.1-2.4 | Experimental | 140 | Filler       | Neither | Context  | Click on the white circle.         |
| 2.1-2.4 | Experimental | 140 | Filler       | Neither | Critical | Now click on the white circle.     |
| 2.1-2.4 | Experimental | 141 | Filler       | Neither | Context  | Click on the black triangle.       |
| 2.1-2.4 | Experimental | 141 | Filler       | Neither | Critical | Now click on the black triangle.   |
| 2.1-2.4 | Experimental | 142 | Experimental | Both    | Context  | Click on the purple star.          |
| 2.1-2.4 | Experimental | 142 | Experimental | Both    | Critical | Now click on the black diamond.    |

|         |              |     |              |         |          |                                   |
|---------|--------------|-----|--------------|---------|----------|-----------------------------------|
| 2.1-2.4 | Experimental | 143 | Filler       | Neither | Context  | Click on the blue triangle.       |
| 2.1-2.4 | Experimental | 143 | Filler       | Neither | Critical | Now click on the blue triangle.   |
| 2.1-2.4 | Experimental | 144 | Filler       | Neither | Context  | Click on the green square.        |
| 2.1-2.4 | Experimental | 144 | Filler       | Neither | Critical | Now click on the green square.    |
| 2.1-2.4 | Experimental | 145 | Filler       | Shape   | Context  | Click on the yellow square.       |
| 2.1-2.4 | Experimental | 145 | Filler       | Shape   | Critical | Now click on the yellow heart.    |
| 2.1-2.4 | Experimental | 146 | Filler       | Neither | Context  | Click on the red oval.            |
| 2.1-2.4 | Experimental | 146 | Filler       | Neither | Critical | Now click on the red oval.        |
| 2.1-2.4 | Experimental | 147 | Experimental | Both    | Context  | Click on the purple rectangle.    |
| 2.1-2.4 | Experimental | 147 | Experimental | Both    | Critical | Now click on the black heart.     |
| 2.1-2.4 | Experimental | 148 | Experimental | Color   | Context  | Click on the red diamond.         |
| 2.1-2.4 | Experimental | 148 | Experimental | Color   | Critical | Now click on the blue diamond.    |
| 2.1-2.4 | Experimental | 149 | Experimental | Color   | Context  | Click on the yellow rectangle.    |
| 2.1-2.4 | Experimental | 149 | Experimental | Color   | Critical | Now click on the black rectangle. |
| 2.1-2.4 | Experimental | 150 | Experimental | Both    | Context  | Click on the orange triangle.     |
| 2.1-2.4 | Experimental | 150 | Experimental | Both    | Critical | Now click on the yellow square.   |
| 2.1-2.4 | Experimental | 151 | Experimental | Both    | Context  | Click on the orange star.         |
| 2.1-2.4 | Experimental | 151 | Experimental | Both    | Critical | Now click on the blue triangle.   |
| 2.1-2.4 | Experimental | 152 | Experimental | Color   | Context  | Click on the green star.          |
| 2.1-2.4 | Experimental | 152 | Experimental | Color   | Critical | Now click on the red star.        |
| 2.1-2.4 | Experimental | 153 | Filler       | Shape   | Context  | Click on the white heart.         |
| 2.1-2.4 | Experimental | 153 | Filler       | Shape   | Critical | Now click on the white rectangle. |
| 2.1-2.4 | Experimental | 154 | Experimental | Color   | Context  | Click on the black rectangle.     |
| 2.1-2.4 | Experimental | 154 | Experimental | Color   | Critical | Now click on the red rectangle.   |
| 2.1-2.4 | Experimental | 155 | Filler       | Neither | Context  | Click on the purple star.         |
| 2.1-2.4 | Experimental | 155 | Filler       | Neither | Critical | Now click on the purple star.     |
| 2.1-2.4 | Experimental | 156 | Experimental | Both    | Context  | Click on the orange diamond.      |
| 2.1-2.4 | Experimental | 156 | Experimental | Both    | Critical | Now click on the red square.      |
| 2.1-2.4 | Experimental | 157 | Filler       | Shape   | Context  | Click on the blue star.           |
| 2.1-2.4 | Experimental | 157 | Filler       | Shape   | Critical | Now click on the blue triangle.   |
| 2.1-2.4 | Experimental | 158 | Filler       | Shape   | Context  | Click on the green diamond.       |
| 2.1-2.4 | Experimental | 158 | Filler       | Shape   | Critical | Now click on the green circle.    |

|         |              |     |              |         |          |                                 |
|---------|--------------|-----|--------------|---------|----------|---------------------------------|
| 2.1-2.4 | Experimental | 159 | Filler       | Neither | Context  | Click on the orange circle.     |
| 2.1-2.4 | Experimental | 159 | Filler       | Neither | Critical | Now click on the orange circle. |
| 2.1-2.4 | Experimental | 160 | Experimental | Color   | Context  | Click on the purple circle.     |
| 2.1-2.4 | Experimental | 160 | Experimental | Color   | Critical | Now click on the yellow circle. |

**Audio recording list.**

| <b>Context</b>                 | <b>Continuation</b>                | <b>Contrast type</b> | <b>Accenting</b> |
|--------------------------------|------------------------------------|----------------------|------------------|
| Click on the blue circle.      | Now click on the red circle.       | Color                | Contrastive      |
| Click on the red circle.       | Now click on the blue circle.      | Color                | Contrastive      |
| Click on the red circle.       | Now click on the green circle.     | Color                | Contrastive      |
| Click on the red circle.       | Now click on the yellow circle.    | Color                | Contrastive      |
| Click on the red circle.       | Now click on the orange circle.    | Color                | Contrastive      |
| Click on the red circle.       | Now click on the purple circle.    | Color                | Contrastive      |
| Click on the red circle.       | Now click on the white circle.     | Color                | Contrastive      |
| Click on the red circle.       | Now click on the black circle.     | Color                | Contrastive      |
| Click on the blue square.      | Now click on the red square.       | Color                | Contrastive      |
| Click on the green square.     | Now click on the blue square.      | Color                | Contrastive      |
| Click on the blue square.      | Now click on the green square.     | Color                | Contrastive      |
| Click on the blue square.      | Now click on the yellow square.    | Color                | Contrastive      |
| Click on the blue square.      | Now click on the orange square.    | Color                | Contrastive      |
| Click on the blue square.      | Now click on the purple square.    | Color                | Contrastive      |
| Click on the blue square.      | Now click on the white square.     | Color                | Contrastive      |
| Click on the blue square.      | Now click on the black square.     | Color                | Contrastive      |
| Click on the green triangle.   | Now click on the red triangle.     | Color                | Contrastive      |
| Click on the green triangle.   | Now click on the blue triangle.    | Color                | Contrastive      |
| Click on the yellow triangle.  | Now click on the green square.     | Color                | Contrastive      |
| Click on the green triangle.   | Now click on the yellow triangle.  | Color                | Contrastive      |
| Click on the green triangle.   | Now click on the orange triangle.  | Color                | Contrastive      |
| Click on the green triangle.   | Now click on the purple triangle.  | Color                | Contrastive      |
| Click on the green triangle.   | Now click on the white triangle.   | Color                | Contrastive      |
| Click on the green triangle.   | Now click on the black triangle.   | Color                | Contrastive      |
| Click on the yellow rectangle. | Now click on the red rectangle.    | Color                | Contrastive      |
| Click on the yellow rectangle. | Now click on the blue rectangle.   | Color                | Contrastive      |
| Click on the yellow rectangle. | Now click on the green rectangle.  | Color                | Contrastive      |
| Click on the orange rectangle. | Now click on the yellow rectangle. | Color                | Contrastive      |
| Click on the yellow rectangle. | Now click on the orange rectangle. | Color                | Contrastive      |
| Click on the yellow rectangle. | Now click on the purple rectangle. | Color                | Contrastive      |
| Click on the yellow rectangle. | Now click on the white rectangle.  | Color                | Contrastive      |
| Click on the yellow rectangle. | Now click on the black rectangle.  | Color                | Contrastive      |
| Click on the orange diamond.   | Now click on the red diamond.      | Color                | Contrastive      |
| Click on the orange diamond.   | Now click on the blue diamond.     | Color                | Contrastive      |
| Click on the orange diamond.   | Now click on the green diamond.    | Color                | Contrastive      |
| Click on the orange diamond.   | Now click on the yellow diamond.   | Color                | Contrastive      |
| Click on the purple diamond.   | Now click on the orange diamond.   | Color                | Contrastive      |
| Click on the orange diamond.   | Now click on the purple diamond.   | Color                | Contrastive      |
| Click on the orange diamond.   | Now click on the white diamond.    | Color                | Contrastive      |
| Click on the orange diamond.   | Now click on the black diamond.    | Color                | Contrastive      |
| Click on the purple oval.      | Now click on the red oval.         | Color                | Contrastive      |

|                               |                                    |       |                |
|-------------------------------|------------------------------------|-------|----------------|
| Click on the purple oval.     | Now click on the blue oval.        | Color | Contrastive    |
| Click on the purple oval.     | Now click on the green oval.       | Color | Contrastive    |
| Click on the purple oval.     | Now click on the yellow oval.      | Color | Contrastive    |
| Click on the purple oval.     | Now click on the orange oval.      | Color | Contrastive    |
| Click on the white oval.      | Now click on the purple oval.      | Color | Contrastive    |
| Click on the purple oval.     | Now click on the white oval.       | Color | Contrastive    |
| Click on the purple oval.     | Now click on the black oval.       | Color | Contrastive    |
| Click on the white star.      | Now click on the red star.         | Color | Contrastive    |
| Click on the white star.      | Now click on the blue star.        | Color | Contrastive    |
| Click on the white star.      | Now click on the green star.       | Color | Contrastive    |
| Click on the white star.      | Now click on the yellow star.      | Color | Contrastive    |
| Click on the white star.      | Now click on the orange star.      | Color | Contrastive    |
| Click on the white star.      | Now click on the purple star.      | Color | Contrastive    |
| Click on the black star.      | Now click on the white star.       | Color | Contrastive    |
| Click on the white star.      | Now click on the black star.       | Color | Contrastive    |
| Click on the black heart.     | Now click on the red heart.        | Color | Contrastive    |
| Click on the black heart.     | Now click on the blue heart.       | Color | Contrastive    |
| Click on the black heart.     | Now click on the green heart.      | Color | Contrastive    |
| Click on the black heart.     | Now click on the yellow heart.     | Color | Contrastive    |
| Click on the black heart.     | Now click on the orange heart.     | Color | Contrastive    |
| Click on the black heart.     | Now click on the purple heart.     | Color | Contrastive    |
| Click on the black heart.     | Now click on the white heart.      | Color | Contrastive    |
| Click on the red heart.       | Now click on the black heart.      | Color | Contrastive    |
| Click on the blue square.     | Now click on the red circle.       | Both  | Presentational |
| Click on the red circle.      | Now click on the blue square.      | Both  | Presentational |
| Click on the red circle.      | Now click on the green triangle.   | Both  | Presentational |
| Click on the red circle.      | Now click on the yellow rectangle. | Both  | Presentational |
| Click on the red circle.      | Now click on the orange diamond.   | Both  | Presentational |
| Click on the red circle.      | Now click on the purple oval.      | Both  | Presentational |
| Click on the red circle.      | Now click on the white star.       | Both  | Presentational |
| Click on the red circle.      | Now click on the black heart.      | Both  | Presentational |
| Click on the blue triangle.   | Now click on the red square.       | Both  | Presentational |
| Click on the green rectangle. | Now click on the blue triangle.    | Both  | Presentational |
| Click on the blue triangle.   | Now click on the green rectangle.  | Both  | Presentational |
| Click on the blue triangle.   | Now click on the yellow diamond.   | Both  | Presentational |
| Click on the blue triangle.   | Now click on the orange oval.      | Both  | Presentational |
| Click on the blue triangle.   | Now click on the purple star.      | Both  | Presentational |
| Click on the blue triangle.   | Now click on the white heart.      | Both  | Presentational |
| Click on the blue triangle.   | Now click on the black circle.     | Both  | Presentational |
| Click on the green diamond.   | Now click on the red triangle.     | Both  | Presentational |
| Click on the green diamond.   | Now click on the blue rectangle.   | Both  | Presentational |
| Click on the yellow oval.     | Now click on the green diamond.    | Both  | Presentational |
| Click on the green diamond.   | Now click on the yellow oval.      | Both  | Presentational |
| Click on the green diamond.   | Now click on the orange star.      | Both  | Presentational |
| Click on the green diamond.   | Now click on the purple heart.     | Both  | Presentational |



|                               |                                    |       |                |
|-------------------------------|------------------------------------|-------|----------------|
| Click on the green diamond.   | Now click on the white circle.     | Both  | Presentational |
| Click on the green diamond.   | Now click on the black square.     | Both  | Presentational |
| Click on the yellow star.     | Now click on the red rectangle.    | Both  | Presentational |
| Click on the yellow star.     | Now click on the blue diamond.     | Both  | Presentational |
| Click on the yellow star.     | Now click on the green oval.       | Both  | Presentational |
| Click on the orange heart.    | Now click on the yellow star.      | Both  | Presentational |
| Click on the yellow star.     | Now click on the orange heart.     | Both  | Presentational |
| Click on the yellow star.     | Now click on the purple circle.    | Both  | Presentational |
| Click on the yellow star.     | Now click on the white square.     | Both  | Presentational |
| Click on the yellow star.     | Now click on the black triangle.   | Both  | Presentational |
| Click on the orange circle.   | Now click on the red diamond.      | Both  | Presentational |
| Click on the orange circle.   | Now click on the blue oval.        | Both  | Presentational |
| Click on the orange circle.   | Now click on the green star.       | Both  | Presentational |
| Click on the orange circle.   | Now click on the yellow heart.     | Both  | Presentational |
| Click on the purple square.   | Now click on the orange circle.    | Both  | Presentational |
| Click on the orange circle.   | Now click on the purple square.    | Both  | Presentational |
| Click on the orange circle.   | Now click on the white triangle.   | Both  | Presentational |
| Click on the orange circle.   | Now click on the black rectangle.  | Both  | Presentational |
| Click on the purple triangle. | Now click on the red oval.         | Both  | Presentational |
| Click on the purple triangle. | Now click on the blue star.        | Both  | Presentational |
| Click on the purple triangle. | Now click on the green heart.      | Both  | Presentational |
| Click on the purple triangle. | Now click on the yellow circle.    | Both  | Presentational |
| Click on the purple triangle. | Now click on the orange square.    | Both  | Presentational |
| Click on the white rectangle. | Now click on the purple triangle.  | Both  | Presentational |
| Click on the purple triangle. | Now click on the white rectangle.  | Both  | Presentational |
| Click on the purple triangle. | Now click on the black diamond.    | Both  | Presentational |
| Click on the white diamond.   | Now click on the red star.         | Both  | Presentational |
| Click on the white diamond.   | Now click on the blue heart.       | Both  | Presentational |
| Click on the white diamond.   | Now click on the green circle.     | Both  | Presentational |
| Click on the white diamond.   | Now click on the yellow square.    | Both  | Presentational |
| Click on the white diamond.   | Now click on the orange triangle.  | Both  | Presentational |
| Click on the white diamond.   | Now click on the purple rectangle. | Both  | Presentational |
| Click on the black oval.      | Now click on the white diamond.    | Both  | Presentational |
| Click on the white diamond.   | Now click on the black oval.       | Both  | Presentational |
| Click on the black star.      | Now click on the red heart.        | Both  | Presentational |
| Click on the black star.      | Now click on the blue circle.      | Both  | Presentational |
| Click on the black star.      | Now click on the green square.     | Both  | Presentational |
| Click on the black star.      | Now click on the yellow triangle.  | Both  | Presentational |
| Click on the black star.      | Now click on the orange rectangle. | Both  | Presentational |
| Click on the black star.      | Now click on the purple diamond.   | Both  | Presentational |
| Click on the black star.      | Now click on the white oval.       | Both  | Presentational |
| Click on the red heart.       | Now click on the black star.       | Both  | Presentational |
| Click on the red square.      | Now click on the red circle.       | Shape | Contrastive    |
| Click on the red circle.      | Now click on the red square.       | Shape | Contrastive    |
| Click on the red circle.      | Now click on the red triangle.     | Shape | Contrastive    |

|                                |                                    |       |             |
|--------------------------------|------------------------------------|-------|-------------|
| Click on the red circle.       | Now click on the red rectangle.    | Shape | Contrastive |
| Click on the red circle.       | Now click on the red diamond.      | Shape | Contrastive |
| Click on the red circle.       | Now click on the red oval.         | Shape | Contrastive |
| Click on the red circle.       | Now click on the red star.         | Shape | Contrastive |
| Click on the red circle.       | Now click on the red heart.        | Shape | Contrastive |
| Click on the blue square.      | Now click on the blue circle.      | Shape | Contrastive |
| Click on the blue triangle.    | Now click on the blue square.      | Shape | Contrastive |
| Click on the blue square.      | Now click on the blue triangle.    | Shape | Contrastive |
| Click on the blue square.      | Now click on the blue rectangle.   | Shape | Contrastive |
| Click on the blue square.      | Now click on the blue diamond.     | Shape | Contrastive |
| Click on the blue square.      | Now click on the blue oval.        | Shape | Contrastive |
| Click on the blue square.      | Now click on the blue star.        | Shape | Contrastive |
| Click on the blue square.      | Now click on the blue heart.       | Shape | Contrastive |
| Click on the green triangle.   | Now click on the green circle.     | Shape | Contrastive |
| Click on the green triangle.   | Now click on the green square.     | Shape | Contrastive |
| Click on the green rectangle.  | Now click on the green triangle.   | Shape | Contrastive |
| Click on the green triangle.   | Now click on the green rectangle.  | Shape | Contrastive |
| Click on the green triangle.   | Now click on the green diamond.    | Shape | Contrastive |
| Click on the green triangle.   | Now click on the green oval.       | Shape | Contrastive |
| Click on the green triangle.   | Now click on the green star.       | Shape | Contrastive |
| Click on the green triangle.   | Now click on the green heart.      | Shape | Contrastive |
| Click on the yellow rectangle. | Now click on the yellow circle.    | Shape | Contrastive |
| Click on the yellow rectangle. | Now click on the yellow square.    | Shape | Contrastive |
| Click on the yellow rectangle. | Now click on the yellow triangle.  | Shape | Contrastive |
| Click on the yellow diamond.   | Now click on the yellow rectangle. | Shape | Contrastive |
| Click on the yellow rectangle. | Now click on the yellow diamond.   | Shape | Contrastive |
| Click on the yellow rectangle. | Now click on the yellow oval.      | Shape | Contrastive |
| Click on the yellow rectangle. | Now click on the yellow star.      | Shape | Contrastive |
| Click on the yellow rectangle. | Now click on the yellow heart.     | Shape | Contrastive |
| Click on the orange diamond.   | Now click on the yellow circle.    | Shape | Contrastive |
| Click on the orange diamond.   | Now click on the yellow square.    | Shape | Contrastive |
| Click on the orange diamond.   | Now click on the yellow triangle.  | Shape | Contrastive |
| Click on the orange diamond.   | Now click on the yellow rectangle. | Shape | Contrastive |
| Click on the orange oval.      | Now click on the yellow diamond.   | Shape | Contrastive |
| Click on the orange diamond.   | Now click on the yellow oval.      | Shape | Contrastive |
| Click on the orange diamond.   | Now click on the yellow star.      | Shape | Contrastive |
| Click on the orange diamond.   | Now click on the yellow heart.     | Shape | Contrastive |
| Click on the purple oval.      | Now click on the purple circle.    | Shape | Contrastive |
| Click on the purple oval.      | Now click on the purple square.    | Shape | Contrastive |
| Click on the purple oval.      | Now click on the purple triangle.  | Shape | Contrastive |
| Click on the purple oval.      | Now click on the purple rectangle. | Shape | Contrastive |
| Click on the purple oval.      | Now click on the purple diamond.   | Shape | Contrastive |
| Click on the purple star.      | Now click on the purple oval.      | Shape | Contrastive |
| Click on the purple oval.      | Now click on the purple star.      | Shape | Contrastive |
| Click on the purple oval.      | Now click on the purple heart.     | Shape | Contrastive |

|                                |                                          |         |                |
|--------------------------------|------------------------------------------|---------|----------------|
| Click on the white star.       | Now click on the white circle.           | Shape   | Contrastive    |
| Click on the white star.       | Now click on the white square.           | Shape   | Contrastive    |
| Click on the white star.       | Now click on the white triangle.         | Shape   | Contrastive    |
| Click on the white star.       | Now click on the white rectangle.        | Shape   | Contrastive    |
| Click on the white star.       | Now click on the white diamond.          | Shape   | Contrastive    |
| Click on the white star.       | Now click on the white oval.             | Shape   | Contrastive    |
| Click on the white heart.      | Now click on the white star.             | Shape   | Contrastive    |
| Click on the white star.       | Now click on the white heart.            | Shape   | Contrastive    |
| Click on the black heart.      | Now click on the black circle.           | Shape   | Contrastive    |
| Click on the black heart.      | Now click on the black square.           | Shape   | Contrastive    |
| Click on the black heart.      | Now click on the black triangle.         | Shape   | Contrastive    |
| Click on the black heart.      | Now click on the black rectangle.        | Shape   | Contrastive    |
| Click on the black heart.      | Now click on the black diamond.          | Shape   | Contrastive    |
| Click on the black heart.      | Now click on the black oval.             | Shape   | Contrastive    |
| Click on the black heart.      | Now click on the black star.             | Shape   | Contrastive    |
| Click on the black circle.     | Now click on the black heart.            | Shape   | Contrastive    |
| Click on the red circle.       | Now click on the red circle again.       | Neither | Presentational |
| Click on the blue square.      | Now click on the blue square again.      | Neither | Presentational |
| Click on the green triangle.   | Now click on the green triangle again.   | Neither | Presentational |
| Click on the yellow rectangle. | Now click on the yellow rectangle again. | Neither | Presentational |
| Click on the orange diamond.   | Now click on the orange diamond again.   | Neither | Presentational |
| Click on the purple oval.      | Now click on the purple oval again.      | Neither | Presentational |
| Click on the white star.       | Now click on the white star again.       | Neither | Presentational |
| Click on the black heart.      | Now click on the black heart again.      | Neither | Presentational |
| Click on the red square.       | Now click on the red square again.       | Neither | Presentational |
| Click on the blue triangle.    | Now click on the blue triangle again.    | Neither | Presentational |
| Click on the green rectangle.  | Now click on the green rectangle again.  | Neither | Presentational |
| Click on the yellow diamond.   | Now click on the yellow diamond again.   | Neither | Presentational |
| Click on the orange oval.      | Now click on the orange oval again.      | Neither | Presentational |
| Click on the purple star.      | Now click on the purple star again.      | Neither | Presentational |
| Click on the white heart.      | Now click on the white heart again.      | Neither | Presentational |
| Click on the black circle.     | Now click on the black circle again.     | Neither | Presentational |
| Click on the red triangle.     | Now click on the red triangle again.     | Neither | Presentational |
| Click on the blue rectangle.   | Now click on the blue rectangle again.   | Neither | Presentational |
| Click on the green diamond.    | Now click on the green diamond again.    | Neither | Presentational |
| Click on the yellow oval.      | Now click on the yellow oval again.      | Neither | Presentational |
| Click on the orange star.      | Now click on the orange star again.      | Neither | Presentational |
| Click on the purple heart.     | Now click on the purple heart again.     | Neither | Presentational |
| Click on the white circle.     | Now click on the white circle again.     | Neither | Presentational |
| Click on the black square.     | Now click on the black square again.     | Neither | Presentational |
| Click on the red rectangle.    | Now click on the red rectangle again.    | Neither | Presentational |
| Click on the blue diamond.     | Now click on the blue diamond again.     | Neither | Presentational |
| Click on the green oval.       | Now click on the green oval again.       | Neither | Presentational |
| Click on the yellow star.      | Now click on the yellow star again.      | Neither | Presentational |
| Click on the orange heart.     | Now click on the orange heart again.     | Neither | Presentational |

|                                |                                          |         |                |
|--------------------------------|------------------------------------------|---------|----------------|
| Click on the purple circle.    | Now click on the purple circle again.    | Neither | Presentational |
| Click on the white square.     | Now click on the white square again.     | Neither | Presentational |
| Click on the black triangle.   | Now click on the black triangle again.   | Neither | Presentational |
| Click on the red diamond.      | Now click on the red diamond again.      | Neither | Presentational |
| Click on the blue oval.        | Now click on the blue oval again.        | Neither | Presentational |
| Click on the green star.       | Now click on the green star again.       | Neither | Presentational |
| Click on the yellow heart.     | Now click on the yellow heart again.     | Neither | Presentational |
| Click on the orange circle.    | Now click on the orange circle again.    | Neither | Presentational |
| Click on the purple square.    | Now click on the purple square again.    | Neither | Presentational |
| Click on the white triangle.   | Now click on the white triangle again.   | Neither | Presentational |
| Click on the black rectangle.  | Now click on the black rectangle again.  | Neither | Presentational |
| Click on the red oval.         | Now click on the red oval again.         | Neither | Presentational |
| Click on the blue star.        | Now click on the blue star again.        | Neither | Presentational |
| Click on the green heart.      | Now click on the green heart again.      | Neither | Presentational |
| Click on the yellow circle.    | Now click on the yellow circle again.    | Neither | Presentational |
| Click on the orange square.    | Now click on the orange square again.    | Neither | Presentational |
| Click on the purple triangle.  | Now click on the purple triangle again.  | Neither | Presentational |
| Click on the white rectangle.  | Now click on the white rectangle again.  | Neither | Presentational |
| Click on the black diamond.    | Now click on the black diamond again.    | Neither | Presentational |
| Click on the red star.         | Now click on the red star again.         | Neither | Presentational |
| Click on the blue heart.       | Now click on the blue heart again.       | Neither | Presentational |
| Click on the green circle.     | Now click on the green circle again.     | Neither | Presentational |
| Click on the yellow square.    | Now click on the yellow square again.    | Neither | Presentational |
| Click on the orange triangle.  | Now click on the orange triangle again.  | Neither | Presentational |
| Click on the purple rectangle. | Now click on the purple rectangle again. | Neither | Presentational |
| Click on the white diamond.    | Now click on the white diamond again.    | Neither | Presentational |
| Click on the black oval.       | Now click on the black oval again.       | Neither | Presentational |
| Click on the red heart.        | Now click on the red heart again.        | Neither | Presentational |
| Click on the blue circle.      | Now click on the blue circle again.      | Neither | Presentational |
| Click on the green square.     | Now click on the green square again.     | Neither | Presentational |
| Click on the yellow triangle.  | Now click on the yellow triangle again.  | Neither | Presentational |
| Click on the orange rectangle. | Now click on the orange rectangle again. | Neither | Presentational |
| Click on the purple diamond.   | Now click on the purple diamond again.   | Neither | Presentational |
| Click on the white oval.       | Now click on the white oval again.       | Neither | Presentational |
| Click on the black star.       | Now click on the black star again.       | Neither | Presentational |

**Complete list of sentences used in Expt. 2.**

| <b>List set</b> | <b>Block</b> | <b>Trial no.</b> | <b>Experimental vs. filler</b> | <b>Contrast</b> | <b>Type</b> | <b>Sentence</b>                        |
|-----------------|--------------|------------------|--------------------------------|-----------------|-------------|----------------------------------------|
| 1.1-1.4         | Practice     | 1                | Experimental                   | Color           | Context     | Click on the yellow star.              |
| 1.1-1.4         | Practice     | 1                | Experimental                   | Color           | Critical    | Now click on the purple star.          |
| 1.1-1.4         | Practice     | 2                | Filler                         | Shape           | Context     | Click on the black rectangle.          |
| 1.1-1.4         | Practice     | 2                | Filler                         | Shape           | Critical    | Now click on the black oval.           |
| 1.1-1.4         | Practice     | 3                | Filler                         | Neither         | Context     | Click on the blue square.              |
| 1.1-1.4         | Practice     | 3                | Filler                         | Neither         | Critical    | Now click on the blue square.          |
| 1.1-1.4         | Practice     | 4                | Filler                         | Shape           | Context     | Click on the white square.             |
| 1.1-1.4         | Practice     | 4                | Filler                         | Shape           | Critical    | Now click on the white rectangle.      |
| 1.1-1.4         | Practice     | 5                | Experimental                   | Both            | Context     | Click on the blue diamond.             |
| 1.1-1.4         | Practice     | 5                | Experimental                   | Both            | Critical    | Now click on the orange heart.         |
| 1.1-1.4         | Practice     | 6                | Experimental                   | Color           | Context     | Click on the red triangle.             |
| 1.1-1.4         | Practice     | 6                | Experimental                   | Color           | Critical    | Now click on the green triangle.       |
| 1.1-1.4         | Practice     | 7                | Filler                         | Neither         | Context     | Click on the yellow diamond.           |
| 1.1-1.4         | Practice     | 7                | Filler                         | Neither         | Critical    | Now click on the yellow diamond again. |
| 1.1-1.4         | Practice     | 8                | Experimental                   | Both            | Context     | Click on the purple heart.             |
| 1.1-1.4         | Practice     | 8                | Experimental                   | Both            | Critical    | Now click on the red circle.           |
| 1.1-1.4         | Experimental | 1                | Experimental                   | Color           | Context     | Click on the blue triangle.            |
| 1.1-1.4         | Experimental | 1                | Experimental                   | Color           | Critical    | Now click on the yellow triangle.      |
| 1.1-1.4         | Experimental | 2                | Experimental                   | Both            | Context     | Click on the blue circle.              |
| 1.1-1.4         | Experimental | 2                | Experimental                   | Both            | Critical    | Now click on the green rectangle.      |
| 1.1-1.4         | Experimental | 3                | Filler                         | Shape           | Context     | Click on the white circle.             |
| 1.1-1.4         | Experimental | 3                | Filler                         | Shape           | Critical    | Now click on the white star.           |
| 1.1-1.4         | Experimental | 4                | Experimental                   | Both            | Context     | Click on the blue rectangle.           |
| 1.1-1.4         | Experimental | 4                | Experimental                   | Both            | Critical    | Now click on the purple circle.        |
| 1.1-1.4         | Experimental | 5                | Experimental                   | Both            | Context     | Click on the blue oval.                |
| 1.1-1.4         | Experimental | 5                | Experimental                   | Both            | Critical    | Now click on the yellow triangle.      |
| 1.1-1.4         | Experimental | 6                | Filler                         | Neither         | Context     | Click on the yellow square.            |
| 1.1-1.4         | Experimental | 6                | Filler                         | Neither         | Critical    | Now click on the yellow square again.  |

|         |              |    |              |         |          |                                         |
|---------|--------------|----|--------------|---------|----------|-----------------------------------------|
| 1.1-1.4 | Experimental | 7  | Filler       | Neither | Context  | Click on the black rectangle.           |
| 1.1-1.4 | Experimental | 7  | Filler       | Neither | Critical | Now click on the black rectangle again. |
| 1.1-1.4 | Experimental | 8  | Filler       | Shape   | Context  | Click on the black circle.              |
| 1.1-1.4 | Experimental | 8  | Filler       | Shape   | Critical | Now click on the black diamond.         |
| 1.1-1.4 | Experimental | 9  | Experimental | Color   | Context  | Click on the red diamond.               |
| 1.1-1.4 | Experimental | 9  | Experimental | Color   | Critical | Now click on the yellow diamond.        |
| 1.1-1.4 | Experimental | 10 | Filler       | Neither | Context  | Click on the white oval.                |
| 1.1-1.4 | Experimental | 10 | Filler       | Neither | Critical | Now click on the white oval again.      |
| 1.1-1.4 | Experimental | 11 | Experimental | Color   | Context  | Click on the black diamond.             |
| 1.1-1.4 | Experimental | 11 | Experimental | Color   | Critical | Now click on the purple diamond.        |
| 1.1-1.4 | Experimental | 12 | Filler       | Shape   | Context  | Click on the yellow diamond.            |
| 1.1-1.4 | Experimental | 12 | Filler       | Shape   | Critical | Now click on the yellow circle.         |
| 1.1-1.4 | Experimental | 13 | Experimental | Color   | Context  | Click on the white triangle.            |
| 1.1-1.4 | Experimental | 13 | Experimental | Color   | Critical | Now click on the orange triangle.       |
| 1.1-1.4 | Experimental | 14 | Experimental | Both    | Context  | Click on the red star.                  |
| 1.1-1.4 | Experimental | 14 | Experimental | Both    | Critical | Now click on the white triangle.        |
| 1.1-1.4 | Experimental | 15 | Filler       | Shape   | Context  | Click on the purple circle.             |
| 1.1-1.4 | Experimental | 15 | Filler       | Shape   | Critical | Now click on the purple diamond.        |
| 1.1-1.4 | Experimental | 16 | Filler       | Shape   | Context  | Click on the green star.                |
| 1.1-1.4 | Experimental | 16 | Filler       | Shape   | Critical | Now click on the green diamond.         |
| 1.1-1.4 | Experimental | 17 | Filler       | Neither | Context  | Click on the red circle.                |
| 1.1-1.4 | Experimental | 17 | Filler       | Neither | Critical | Now click on the red circle again.      |
| 1.1-1.4 | Experimental | 18 | Experimental | Color   | Context  | Click on the blue square.               |
| 1.1-1.4 | Experimental | 18 | Experimental | Color   | Critical | Now click on the black square.          |
| 1.1-1.4 | Experimental | 19 | Experimental | Color   | Context  | Click on the blue star.                 |
| 1.1-1.4 | Experimental | 19 | Experimental | Color   | Critical | Now click on the white star.            |
| 1.1-1.4 | Experimental | 20 | Filler       | Neither | Context  | Click on the green square.              |
| 1.1-1.4 | Experimental | 20 | Filler       | Neither | Critical | Now click on the green square again.    |
| 1.1-1.4 | Experimental | 21 | Filler       | Shape   | Context  | Click on the blue circle.               |
| 1.1-1.4 | Experimental | 21 | Filler       | Shape   | Critical | Now click on the blue heart.            |
| 1.1-1.4 | Experimental | 22 | Experimental | Color   | Context  | Click on the yellow circle.             |
| 1.1-1.4 | Experimental | 22 | Experimental | Color   | Critical | Now click on the orange circle.         |

|         |              |    |              |         |          |                                        |
|---------|--------------|----|--------------|---------|----------|----------------------------------------|
| 1.1-1.4 | Experimental | 23 | Filler       | Shape   | Context  | Click on the orange triangle.          |
| 1.1-1.4 | Experimental | 23 | Filler       | Shape   | Critical | Now click on the orange square.        |
| 1.1-1.4 | Experimental | 24 | Filler       | Neither | Context  | Click on the blue diamond.             |
| 1.1-1.4 | Experimental | 24 | Filler       | Neither | Critical | Now click on the blue diamond again.   |
| 1.1-1.4 | Experimental | 25 | Experimental | Both    | Context  | Click on the orange oval.              |
| 1.1-1.4 | Experimental | 25 | Experimental | Both    | Critical | Now click on the purple star.          |
| 1.1-1.4 | Experimental | 26 | Filler       | Shape   | Context  | Click on the red diamond.              |
| 1.1-1.4 | Experimental | 26 | Filler       | Shape   | Critical | Now click on the red rectangle.        |
| 1.1-1.4 | Experimental | 27 | Filler       | Neither | Context  | Click on the orange star.              |
| 1.1-1.4 | Experimental | 27 | Filler       | Neither | Critical | Now click on the orange star again.    |
| 1.1-1.4 | Experimental | 28 | Filler       | Neither | Context  | Click on the purple heart.             |
| 1.1-1.4 | Experimental | 28 | Filler       | Neither | Critical | Now click on the purple heart again.   |
| 1.1-1.4 | Experimental | 29 | Experimental | Both    | Context  | Click on the green diamond.            |
| 1.1-1.4 | Experimental | 29 | Experimental | Both    | Critical | Now click on the black square.         |
| 1.1-1.4 | Experimental | 30 | Experimental | Both    | Context  | Click on the yellow diamond.           |
| 1.1-1.4 | Experimental | 30 | Experimental | Both    | Critical | Now click on the orange heart.         |
| 1.1-1.4 | Experimental | 31 | Experimental | Both    | Context  | Click on the black square.             |
| 1.1-1.4 | Experimental | 31 | Experimental | Both    | Critical | Now click on the yellow circle.        |
| 1.1-1.4 | Experimental | 32 | Experimental | Color   | Context  | Click on the purple diamond.           |
| 1.1-1.4 | Experimental | 32 | Experimental | Color   | Critical | Now click on the black diamond.        |
| 1.1-1.4 | Experimental | 33 | Filler       | Neither | Context  | Click on the orange square.            |
| 1.1-1.4 | Experimental | 33 | Filler       | Neither | Critical | Now click on the orange square again.  |
| 1.1-1.4 | Experimental | 34 | Experimental | Both    | Context  | Click on the green square.             |
| 1.1-1.4 | Experimental | 34 | Experimental | Both    | Critical | Now click on the black oval.           |
| 1.1-1.4 | Experimental | 35 | Filler       | Shape   | Context  | Click on the purple diamond.           |
| 1.1-1.4 | Experimental | 35 | Filler       | Shape   | Critical | Now click on the purple rectangle.     |
| 1.1-1.4 | Experimental | 36 | Filler       | Neither | Context  | Click on the yellow diamond.           |
| 1.1-1.4 | Experimental | 36 | Filler       | Neither | Critical | Now click on the yellow diamond again. |
| 1.1-1.4 | Experimental | 37 | Filler       | Neither | Context  | Click on the green oval.               |
| 1.1-1.4 | Experimental | 37 | Filler       | Neither | Critical | Now click on the green oval again.     |
| 1.1-1.4 | Experimental | 38 | Experimental | Color   | Context  | Click on the white star.               |
| 1.1-1.4 | Experimental | 38 | Experimental | Color   | Critical | Now click on the green star.           |

|         |              |    |              |         |          |                                          |
|---------|--------------|----|--------------|---------|----------|------------------------------------------|
| 1.1-1.4 | Experimental | 39 | Filler       | Shape   | Context  | Click on the yellow heart.               |
| 1.1-1.4 | Experimental | 39 | Filler       | Shape   | Critical | Now click on the yellow rectangle.       |
| 1.1-1.4 | Experimental | 40 | Filler       | Neither | Context  | Click on the black circle.               |
| 1.1-1.4 | Experimental | 40 | Filler       | Neither | Critical | Now click on the black circle again.     |
| 1.1-1.4 | Experimental | 41 | Filler       | Shape   | Context  | Click on the black oval.                 |
| 1.1-1.4 | Experimental | 41 | Filler       | Shape   | Critical | Now click on the black square.           |
| 1.1-1.4 | Experimental | 42 | Experimental | Color   | Context  | Click on the black rectangle.            |
| 1.1-1.4 | Experimental | 42 | Experimental | Color   | Critical | Now click on the red rectangle.          |
| 1.1-1.4 | Experimental | 43 | Experimental | Both    | Context  | Click on the green star.                 |
| 1.1-1.4 | Experimental | 43 | Experimental | Both    | Critical | Now click on the red diamond.            |
| 1.1-1.4 | Experimental | 44 | Filler       | Neither | Context  | Click on the purple rectangle.           |
| 1.1-1.4 | Experimental | 44 | Filler       | Neither | Critical | Now click on the purple rectangle again. |
| 1.1-1.4 | Experimental | 45 | Experimental | Color   | Context  | Click on the red square.                 |
| 1.1-1.4 | Experimental | 45 | Experimental | Color   | Critical | Now click on the white square.           |
| 1.1-1.4 | Experimental | 46 | Experimental | Both    | Context  | Click on the green square.               |
| 1.1-1.4 | Experimental | 46 | Experimental | Both    | Critical | Now click on the blue circle.            |
| 1.1-1.4 | Experimental | 47 | Filler       | Neither | Context  | Click on the blue star.                  |
| 1.1-1.4 | Experimental | 47 | Filler       | Neither | Critical | Now click on the blue star again.        |
| 1.1-1.4 | Experimental | 48 | Experimental | Color   | Context  | Click on the purple star.                |
| 1.1-1.4 | Experimental | 48 | Experimental | Color   | Critical | Now click on the red star.               |
| 1.1-1.4 | Experimental | 49 | Filler       | Shape   | Context  | Click on the red square.                 |
| 1.1-1.4 | Experimental | 49 | Filler       | Shape   | Critical | Now click on the red triangle.           |
| 1.1-1.4 | Experimental | 50 | Experimental | Color   | Context  | Click on the orange square.              |
| 1.1-1.4 | Experimental | 50 | Experimental | Color   | Critical | Now click on the red square.             |
| 1.1-1.4 | Experimental | 51 | Filler       | Neither | Context  | Click on the red square.                 |
| 1.1-1.4 | Experimental | 51 | Filler       | Neither | Critical | Now click on the red square again.       |
| 1.1-1.4 | Experimental | 52 | Experimental | Color   | Context  | Click on the green rectangle.            |
| 1.1-1.4 | Experimental | 52 | Experimental | Color   | Critical | Now click on the blue rectangle.         |
| 1.1-1.4 | Experimental | 53 | Experimental | Both    | Context  | Click on the red rectangle.              |
| 1.1-1.4 | Experimental | 53 | Experimental | Both    | Critical | Now click on the white square.           |
| 1.1-1.4 | Experimental | 54 | Filler       | Shape   | Context  | Click on the black circle.               |
| 1.1-1.4 | Experimental | 54 | Filler       | Shape   | Critical | Now click on the black heart.            |



|         |              |    |              |         |          |                                        |
|---------|--------------|----|--------------|---------|----------|----------------------------------------|
| 1.1-1.4 | Experimental | 55 | Filler       | Shape   | Context  | Click on the orange rectangle.         |
| 1.1-1.4 | Experimental | 55 | Filler       | Shape   | Critical | Now click on the orange heart.         |
| 1.1-1.4 | Experimental | 56 | Filler       | Neither | Context  | Click on the white heart.              |
| 1.1-1.4 | Experimental | 56 | Filler       | Neither | Critical | Now click on the white heart again.    |
| 1.1-1.4 | Experimental | 57 | Filler       | Shape   | Context  | Click on the green square.             |
| 1.1-1.4 | Experimental | 57 | Filler       | Shape   | Critical | Now click on the green heart.          |
| 1.1-1.4 | Experimental | 58 | Filler       | Neither | Context  | Click on the orange circle.            |
| 1.1-1.4 | Experimental | 58 | Filler       | Neither | Critical | Now click on the orange circle again.  |
| 1.1-1.4 | Experimental | 59 | Filler       | Neither | Context  | Click on the yellow oval.              |
| 1.1-1.4 | Experimental | 59 | Filler       | Neither | Critical | Now click on the yellow oval again.    |
| 1.1-1.4 | Experimental | 60 | Experimental | Both    | Context  | Click on the purple square.            |
| 1.1-1.4 | Experimental | 60 | Experimental | Both    | Critical | Now click on the white heart.          |
| 1.1-1.4 | Experimental | 61 | Experimental | Color   | Context  | Click on the green oval.               |
| 1.1-1.4 | Experimental | 61 | Experimental | Color   | Critical | Now click on the orange oval.          |
| 1.1-1.4 | Experimental | 62 | Experimental | Color   | Context  | Click on the green triangle.           |
| 1.1-1.4 | Experimental | 62 | Experimental | Color   | Critical | Now click on the purple triangle.      |
| 1.1-1.4 | Experimental | 63 | Filler       | Shape   | Context  | Click on the white heart.              |
| 1.1-1.4 | Experimental | 63 | Filler       | Shape   | Critical | Now click on the white triangle.       |
| 1.1-1.4 | Experimental | 64 | Filler       | Neither | Context  | Click on the green triangle.           |
| 1.1-1.4 | Experimental | 64 | Filler       | Neither | Critical | Now click on the green triangle again. |
| 1.1-1.4 | Experimental | 65 | Experimental | Both    | Context  | Click on the orange heart.             |
| 1.1-1.4 | Experimental | 65 | Experimental | Both    | Critical | Now click on the blue square.          |
| 1.1-1.4 | Experimental | 66 | Experimental | Both    | Context  | Click on the purple triangle.          |
| 1.1-1.4 | Experimental | 66 | Experimental | Both    | Critical | Now click on the green square.         |
| 1.1-1.4 | Experimental | 67 | Experimental | Both    | Context  | Click on the yellow heart.             |
| 1.1-1.4 | Experimental | 67 | Experimental | Both    | Critical | Now click on the purple diamond.       |
| 1.1-1.4 | Experimental | 68 | Filler       | Shape   | Context  | Click on the orange oval.              |
| 1.1-1.4 | Experimental | 68 | Filler       | Shape   | Critical | Now click on the orange rectangle.     |
| 1.1-1.4 | Experimental | 69 | Experimental | Color   | Context  | Click on the white circle.             |
| 1.1-1.4 | Experimental | 69 | Experimental | Color   | Critical | Now click on the green circle.         |
| 1.1-1.4 | Experimental | 70 | Experimental | Both    | Context  | Click on the white triangle.           |
| 1.1-1.4 | Experimental | 70 | Experimental | Both    | Critical | Now click on the black star.           |

|         |              |    |              |         |          |                                         |
|---------|--------------|----|--------------|---------|----------|-----------------------------------------|
| 1.1-1.4 | Experimental | 71 | Experimental | Both    | Context  | Click on the purple star.               |
| 1.1-1.4 | Experimental | 71 | Experimental | Both    | Critical | Now click on the green triangle.        |
| 1.1-1.4 | Experimental | 72 | Filler       | Shape   | Context  | Click on the green diamond.             |
| 1.1-1.4 | Experimental | 72 | Filler       | Shape   | Critical | Now click on the green oval.            |
| 1.1-1.4 | Experimental | 73 | Experimental | Color   | Context  | Click on the yellow star.               |
| 1.1-1.4 | Experimental | 73 | Experimental | Color   | Critical | Now click on the purple star.           |
| 1.1-1.4 | Experimental | 74 | Experimental | Both    | Context  | Click on the orange rectangle.          |
| 1.1-1.4 | Experimental | 74 | Experimental | Both    | Critical | Now click on the black circle.          |
| 1.1-1.4 | Experimental | 75 | Filler       | Shape   | Context  | Click on the blue square.               |
| 1.1-1.4 | Experimental | 75 | Filler       | Shape   | Critical | Now click on the blue oval.             |
| 1.1-1.4 | Experimental | 76 | Experimental | Both    | Context  | Click on the white heart.               |
| 1.1-1.4 | Experimental | 76 | Experimental | Both    | Critical | Now click on the yellow square.         |
| 1.1-1.4 | Experimental | 77 | Filler       | Shape   | Context  | Click on the black oval.                |
| 1.1-1.4 | Experimental | 77 | Filler       | Shape   | Critical | Now click on the black triangle.        |
| 1.1-1.4 | Experimental | 78 | Experimental | Color   | Context  | Click on the white square.              |
| 1.1-1.4 | Experimental | 78 | Experimental | Color   | Critical | Now click on the purple square.         |
| 1.1-1.4 | Experimental | 79 | Experimental | Both    | Context  | Click on the red triangle.              |
| 1.1-1.4 | Experimental | 79 | Experimental | Both    | Critical | Now click on the blue diamond.          |
| 1.1-1.4 | Experimental | 80 | Filler       | Shape   | Context  | Click on the red triangle.              |
| 1.1-1.4 | Experimental | 80 | Filler       | Shape   | Critical | Now click on the red star.              |
| 1.1-1.4 | Experimental | 81 | Filler       | Neither | Context  | Click on the black heart.               |
| 1.1-1.4 | Experimental | 81 | Filler       | Neither | Critical | Now click on the black heart again.     |
| 1.1-1.4 | Experimental | 82 | Filler       | Shape   | Context  | Click on the blue rectangle.            |
| 1.1-1.4 | Experimental | 82 | Filler       | Shape   | Critical | Now click on the blue square.           |
| 1.1-1.4 | Experimental | 83 | Experimental | Color   | Context  | Click on the black oval.                |
| 1.1-1.4 | Experimental | 83 | Experimental | Color   | Critical | Now click on the green oval.            |
| 1.1-1.4 | Experimental | 84 | Experimental | Color   | Context  | Click on the orange diamond.            |
| 1.1-1.4 | Experimental | 84 | Experimental | Color   | Critical | Now click on the blue diamond.          |
| 1.1-1.4 | Experimental | 85 | Experimental | Both    | Context  | Click on the yellow oval.               |
| 1.1-1.4 | Experimental | 85 | Experimental | Both    | Critical | Now click on the white diamond.         |
| 1.1-1.4 | Experimental | 86 | Filler       | Neither | Context  | Click on the purple triangle.           |
| 1.1-1.4 | Experimental | 86 | Filler       | Neither | Critical | Now click on the purple triangle again. |

|         |              |     |              |         |          |                                        |
|---------|--------------|-----|--------------|---------|----------|----------------------------------------|
| 1.1-1.4 | Experimental | 87  | Filler       | Neither | Context  | Click on the blue rectangle.           |
| 1.1-1.4 | Experimental | 87  | Filler       | Neither | Critical | Now click on the blue rectangle again. |
| 1.1-1.4 | Experimental | 88  | Experimental | Both    | Context  | Click on the black square.             |
| 1.1-1.4 | Experimental | 88  | Experimental | Both    | Critical | Now click on the blue star.            |
| 1.1-1.4 | Experimental | 89  | Filler       | Neither | Context  | Click on the red star.                 |
| 1.1-1.4 | Experimental | 89  | Filler       | Neither | Critical | Now click on the red star again.       |
| 1.1-1.4 | Experimental | 90  | Filler       | Shape   | Context  | Click on the yellow rectangle.         |
| 1.1-1.4 | Experimental | 90  | Filler       | Shape   | Critical | Now click on the yellow star.          |
| 1.1-1.4 | Experimental | 91  | Filler       | Shape   | Context  | Click on the white oval.               |
| 1.1-1.4 | Experimental | 91  | Filler       | Shape   | Critical | Now click on the white square.         |
| 1.1-1.4 | Experimental | 92  | Experimental | Color   | Context  | Click on the green square.             |
| 1.1-1.4 | Experimental | 92  | Experimental | Color   | Critical | Now click on the yellow square.        |
| 1.1-1.4 | Experimental | 93  | Experimental | Both    | Context  | Click on the purple heart.             |
| 1.1-1.4 | Experimental | 93  | Experimental | Both    | Critical | Now click on the yellow oval.          |
| 1.1-1.4 | Experimental | 94  | Filler       | Neither | Context  | Click on the white diamond.            |
| 1.1-1.4 | Experimental | 94  | Filler       | Neither | Critical | Now click on the white diamond again.  |
| 1.1-1.4 | Experimental | 95  | Filler       | Shape   | Context  | Click on the yellow square.            |
| 1.1-1.4 | Experimental | 95  | Filler       | Shape   | Critical | Now click on the yellow diamond.       |
| 1.1-1.4 | Experimental | 96  | Experimental | Both    | Context  | Click on the blue diamond.             |
| 1.1-1.4 | Experimental | 96  | Experimental | Both    | Critical | Now click on the orange star.          |
| 1.1-1.4 | Experimental | 97  | Filler       | Neither | Context  | Click on the blue circle.              |
| 1.1-1.4 | Experimental | 97  | Filler       | Neither | Critical | Now click on the blue circle again.    |
| 1.1-1.4 | Experimental | 98  | Experimental | Both    | Context  | Click on the white star.               |
| 1.1-1.4 | Experimental | 98  | Experimental | Both    | Critical | Now click on the orange diamond.       |
| 1.1-1.4 | Experimental | 99  | Filler       | Shape   | Context  | Click on the purple star.              |
| 1.1-1.4 | Experimental | 99  | Filler       | Shape   | Critical | Now click on the purple circle.        |
| 1.1-1.4 | Experimental | 100 | Filler       | Shape   | Context  | Click on the white star.               |
| 1.1-1.4 | Experimental | 100 | Filler       | Shape   | Critical | Now click on the white oval.           |
| 1.1-1.4 | Experimental | 101 | Experimental | Both    | Context  | Click on the orange triangle.          |
| 1.1-1.4 | Experimental | 101 | Experimental | Both    | Critical | Now click on the white rectangle.      |
| 1.1-1.4 | Experimental | 102 | Filler       | Neither | Context  | Click on the black oval.               |
| 1.1-1.4 | Experimental | 102 | Filler       | Neither | Critical | Now click on the black oval again.     |

|         |              |     |              |         |          |                                         |
|---------|--------------|-----|--------------|---------|----------|-----------------------------------------|
| 1.1-1.4 | Experimental | 103 | Experimental | Both    | Context  | Click on the black heart.               |
| 1.1-1.4 | Experimental | 103 | Experimental | Both    | Critical | Now click on the orange triangle.       |
| 1.1-1.4 | Experimental | 104 | Filler       | Shape   | Context  | Click on the yellow triangle.           |
| 1.1-1.4 | Experimental | 104 | Filler       | Shape   | Critical | Now click on the yellow heart.          |
| 1.1-1.4 | Experimental | 105 | Filler       | Shape   | Context  | Click on the blue square.               |
| 1.1-1.4 | Experimental | 105 | Filler       | Shape   | Critical | Now click on the blue rectangle.        |
| 1.1-1.4 | Experimental | 106 | Filler       | Neither | Context  | Click on the purple square.             |
| 1.1-1.4 | Experimental | 106 | Filler       | Neither | Critical | Now click on the purple square again.   |
| 1.1-1.4 | Experimental | 107 | Filler       | Neither | Context  | Click on the red heart.                 |
| 1.1-1.4 | Experimental | 107 | Filler       | Neither | Critical | Now click on the red heart again.       |
| 1.1-1.4 | Experimental | 108 | Experimental | Color   | Context  | Click on the red circle.                |
| 1.1-1.4 | Experimental | 108 | Experimental | Color   | Critical | Now click on the white circle.          |
| 1.1-1.4 | Experimental | 109 | Experimental | Color   | Context  | Click on the orange triangle.           |
| 1.1-1.4 | Experimental | 109 | Experimental | Color   | Critical | Now click on the blue triangle.         |
| 1.1-1.4 | Experimental | 110 | Filler       | Neither | Context  | Click on the orange triangle.           |
| 1.1-1.4 | Experimental | 110 | Filler       | Neither | Critical | Now click on the orange triangle again. |
| 1.1-1.4 | Experimental | 111 | Filler       | Shape   | Context  | Click on the red star.                  |
| 1.1-1.4 | Experimental | 111 | Filler       | Shape   | Critical | Now click on the red diamond.           |
| 1.1-1.4 | Experimental | 112 | Experimental | Color   | Context  | Click on the black heart.               |
| 1.1-1.4 | Experimental | 112 | Experimental | Color   | Critical | Now click on the white heart.           |
| 1.1-1.4 | Experimental | 113 | Filler       | Neither | Context  | Click on the green rectangle.           |
| 1.1-1.4 | Experimental | 113 | Filler       | Neither | Critical | Now click on the green rectangle again. |
| 1.1-1.4 | Experimental | 114 | Experimental | Color   | Context  | Click on the white heart.               |
| 1.1-1.4 | Experimental | 114 | Experimental | Color   | Critical | Now click on the green heart.           |
| 1.1-1.4 | Experimental | 115 | Experimental | Color   | Context  | Click on the purple heart.              |
| 1.1-1.4 | Experimental | 115 | Experimental | Color   | Critical | Now click on the black heart.           |
| 1.1-1.4 | Experimental | 116 | Filler       | Neither | Context  | Click on the white star.                |
| 1.1-1.4 | Experimental | 116 | Filler       | Neither | Critical | Now click on the white star again.      |
| 1.1-1.4 | Experimental | 117 | Experimental | Both    | Context  | Click on the blue oval.                 |
| 1.1-1.4 | Experimental | 117 | Experimental | Both    | Critical | Now click on the yellow heart.          |
| 1.1-1.4 | Experimental | 118 | Experimental | Color   | Context  | Click on the yellow oval.               |
| 1.1-1.4 | Experimental | 118 | Experimental | Color   | Critical | Now click on the blue oval.             |

|         |              |     |              |         |          |                                         |
|---------|--------------|-----|--------------|---------|----------|-----------------------------------------|
| 1.1-1.4 | Experimental | 119 | Filler       | Neither | Context  | Click on the yellow triangle.           |
| 1.1-1.4 | Experimental | 119 | Filler       | Neither | Critical | Now click on the yellow triangle again. |
| 1.1-1.4 | Experimental | 120 | Experimental | Color   | Context  | Click on the green heart.               |
| 1.1-1.4 | Experimental | 120 | Experimental | Color   | Critical | Now click on the yellow heart.          |
| 1.1-1.4 | Experimental | 121 | Experimental | Both    | Context  | Click on the orange circle.             |
| 1.1-1.4 | Experimental | 121 | Experimental | Both    | Critical | Now click on the red oval.              |
| 1.1-1.4 | Experimental | 122 | Filler       | Neither | Context  | Click on the black star.                |
| 1.1-1.4 | Experimental | 122 | Filler       | Neither | Critical | Now click on the black star again.      |
| 1.1-1.4 | Experimental | 123 | Filler       | Shape   | Context  | Click on the black rectangle.           |
| 1.1-1.4 | Experimental | 123 | Filler       | Shape   | Critical | Now click on the black circle.          |
| 1.1-1.4 | Experimental | 124 | Experimental | Both    | Context  | Click on the yellow rectangle.          |
| 1.1-1.4 | Experimental | 124 | Experimental | Both    | Critical | Now click on the green oval.            |
| 1.1-1.4 | Experimental | 125 | Filler       | Neither | Context  | Click on the red diamond.               |
| 1.1-1.4 | Experimental | 125 | Filler       | Neither | Critical | Now click on the red diamond again.     |
| 1.1-1.4 | Experimental | 126 | Experimental | Color   | Context  | Click on the orange oval.               |
| 1.1-1.4 | Experimental | 126 | Experimental | Color   | Critical | Now click on the white oval.            |
| 1.1-1.4 | Experimental | 127 | Filler       | Shape   | Context  | Click on the green oval.                |
| 1.1-1.4 | Experimental | 127 | Filler       | Shape   | Critical | Now click on the green star.            |
| 1.1-1.4 | Experimental | 128 | Experimental | Both    | Context  | Click on the white diamond.             |
| 1.1-1.4 | Experimental | 128 | Experimental | Both    | Critical | Now click on the purple heart.          |
| 1.1-1.4 | Experimental | 129 | Experimental | Both    | Context  | Click on the white circle.              |
| 1.1-1.4 | Experimental | 129 | Experimental | Both    | Critical | Now click on the orange rectangle.      |
| 1.1-1.4 | Experimental | 130 | Experimental | Color   | Context  | Click on the yellow rectangle.          |
| 1.1-1.4 | Experimental | 130 | Experimental | Color   | Critical | Now click on the orange rectangle.      |
| 1.1-1.4 | Experimental | 131 | Filler       | Shape   | Context  | Click on the orange star.               |
| 1.1-1.4 | Experimental | 131 | Filler       | Shape   | Critical | Now click on the orange oval.           |
| 1.1-1.4 | Experimental | 132 | Experimental | Color   | Context  | Click on the purple rectangle.          |
| 1.1-1.4 | Experimental | 132 | Experimental | Color   | Critical | Now click on the green rectangle.       |
| 1.1-1.4 | Experimental | 133 | Experimental | Both    | Context  | Click on the black triangle.            |
| 1.1-1.4 | Experimental | 133 | Experimental | Both    | Critical | Now click on the red circle.            |
| 1.1-1.4 | Experimental | 134 | Filler       | Neither | Context  | Click on the orange diamond.            |
| 1.1-1.4 | Experimental | 134 | Filler       | Neither | Critical | Now click on the orange diamond again.  |

|         |              |     |              |         |          |                                      |
|---------|--------------|-----|--------------|---------|----------|--------------------------------------|
| 1.1-1.4 | Experimental | 135 | Experimental | Color   | Context  | Click on the green star.             |
| 1.1-1.4 | Experimental | 135 | Experimental | Color   | Critical | Now click on the black star.         |
| 1.1-1.4 | Experimental | 136 | Experimental | Color   | Context  | Click on the red oval.               |
| 1.1-1.4 | Experimental | 136 | Experimental | Color   | Critical | Now click on the black oval.         |
| 1.1-1.4 | Experimental | 137 | Experimental | Both    | Context  | Click on the yellow star.            |
| 1.1-1.4 | Experimental | 137 | Experimental | Both    | Critical | Now click on the black rectangle.    |
| 1.1-1.4 | Experimental | 138 | Experimental | Color   | Context  | Click on the red rectangle.          |
| 1.1-1.4 | Experimental | 138 | Experimental | Color   | Critical | Now click on the purple rectangle.   |
| 1.1-1.4 | Experimental | 139 | Filler       | Neither | Context  | Click on the purple oval.            |
| 1.1-1.4 | Experimental | 139 | Filler       | Neither | Critical | Now click on the purple oval again.  |
| 1.1-1.4 | Experimental | 140 | Filler       | Shape   | Context  | Click on the white rectangle.        |
| 1.1-1.4 | Experimental | 140 | Filler       | Shape   | Critical | Now click on the white circle.       |
| 1.1-1.4 | Experimental | 141 | Filler       | Shape   | Context  | Click on the black diamond.          |
| 1.1-1.4 | Experimental | 141 | Filler       | Shape   | Critical | Now click on the black triangle.     |
| 1.1-1.4 | Experimental | 142 | Experimental | Color   | Context  | Click on the yellow heart.           |
| 1.1-1.4 | Experimental | 142 | Experimental | Color   | Critical | Now click on the orange heart.       |
| 1.1-1.4 | Experimental | 143 | Filler       | Shape   | Context  | Click on the blue heart.             |
| 1.1-1.4 | Experimental | 143 | Filler       | Shape   | Critical | Now click on the blue triangle.      |
| 1.1-1.4 | Experimental | 144 | Filler       | Shape   | Context  | Click on the green triangle.         |
| 1.1-1.4 | Experimental | 144 | Filler       | Shape   | Critical | Now click on the green square.       |
| 1.1-1.4 | Experimental | 145 | Filler       | Neither | Context  | Click on the yellow heart.           |
| 1.1-1.4 | Experimental | 145 | Filler       | Neither | Critical | Now click on the yellow heart again. |
| 1.1-1.4 | Experimental | 146 | Filler       | Shape   | Context  | Click on the red heart.              |
| 1.1-1.4 | Experimental | 146 | Filler       | Shape   | Critical | Now click on the red oval.           |
| 1.1-1.4 | Experimental | 147 | Experimental | Color   | Context  | Click on the black triangle.         |
| 1.1-1.4 | Experimental | 147 | Experimental | Color   | Critical | Now click on the red triangle.       |
| 1.1-1.4 | Experimental | 148 | Experimental | Both    | Context  | Click on the purple diamond.         |
| 1.1-1.4 | Experimental | 148 | Experimental | Both    | Critical | Now click on the red rectangle.      |
| 1.1-1.4 | Experimental | 149 | Experimental | Both    | Context  | Click on the yellow rectangle.       |
| 1.1-1.4 | Experimental | 149 | Experimental | Both    | Critical | Now click on the blue triangle.      |
| 1.1-1.4 | Experimental | 150 | Experimental | Color   | Context  | Click on the blue diamond.           |
| 1.1-1.4 | Experimental | 150 | Experimental | Color   | Critical | Now click on the red diamond.        |

|         |              |     |              |         |          |                                         |
|---------|--------------|-----|--------------|---------|----------|-----------------------------------------|
| 1.1-1.4 | Experimental | 151 | Experimental | Color   | Context  | Click on the blue circle.               |
| 1.1-1.4 | Experimental | 151 | Experimental | Color   | Critical | Now click on the yellow circle.         |
| 1.1-1.4 | Experimental | 152 | Experimental | Both    | Context  | Click on the green circle.              |
| 1.1-1.4 | Experimental | 152 | Experimental | Both    | Critical | Now click on the red star.              |
| 1.1-1.4 | Experimental | 153 | Filler       | Neither | Context  | Click on the white rectangle.           |
| 1.1-1.4 | Experimental | 153 | Filler       | Neither | Critical | Now click on the white rectangle again. |
| 1.1-1.4 | Experimental | 154 | Experimental | Both    | Context  | Click on the red oval.                  |
| 1.1-1.4 | Experimental | 154 | Experimental | Both    | Critical | Now click on the green heart.           |
| 1.1-1.4 | Experimental | 155 | Filler       | Shape   | Context  | Click on the purple heart.              |
| 1.1-1.4 | Experimental | 155 | Filler       | Shape   | Critical | Now click on the purple star.           |
| 1.1-1.4 | Experimental | 156 | Experimental | Color   | Context  | Click on the purple circle.             |
| 1.1-1.4 | Experimental | 156 | Experimental | Color   | Critical | Now click on the blue circle.           |
| 1.1-1.4 | Experimental | 157 | Filler       | Neither | Context  | Click on the blue triangle.             |
| 1.1-1.4 | Experimental | 157 | Filler       | Neither | Critical | Now click on the blue triangle again.   |
| 1.1-1.4 | Experimental | 158 | Filler       | Neither | Context  | Click on the green circle.              |
| 1.1-1.4 | Experimental | 158 | Filler       | Neither | Critical | Now click on the green circle again.    |
| 1.1-1.4 | Experimental | 159 | Filler       | Shape   | Context  | Click on the orange diamond.            |
| 1.1-1.4 | Experimental | 159 | Filler       | Shape   | Critical | Now click on the orange circle.         |
| 1.1-1.4 | Experimental | 160 | Experimental | Both    | Context  | Click on the red circle.                |
| 1.1-1.4 | Experimental | 160 | Experimental | Both    | Critical | Now click on the purple oval.           |
| 2.1-2.4 | Practice     | 1   | Experimental | Both    | Context  | Click on the white triangle.            |
| 2.1-2.4 | Practice     | 1   | Experimental | Both    | Critical | Now click on the purple star.           |
| 2.1-2.4 | Practice     | 2   | Filler       | Neither | Context  | Click on the black oval.                |
| 2.1-2.4 | Practice     | 2   | Filler       | Neither | Critical | Now click on the black oval.            |
| 2.1-2.4 | Practice     | 3   | Filler       | Shape   | Context  | Click on the blue star.                 |
| 2.1-2.4 | Practice     | 3   | Filler       | Shape   | Critical | Now click on the blue square.           |
| 2.1-2.4 | Practice     | 4   | Filler       | Neither | Context  | Click on the white rectangle.           |
| 2.1-2.4 | Practice     | 4   | Filler       | Neither | Critical | Now click on the white rectangle.       |
| 2.1-2.4 | Practice     | 5   | Experimental | Color   | Context  | Click on the red heart.                 |
| 2.1-2.4 | Practice     | 5   | Experimental | Color   | Critical | Now click on the orange heart.          |
| 2.1-2.4 | Practice     | 6   | Experimental | Both    | Context  | Click on the orange diamond.            |
| 2.1-2.4 | Practice     | 6   | Experimental | Both    | Critical | Now click on the green triangle.        |

|         |              |    |              |         |          |                                       |
|---------|--------------|----|--------------|---------|----------|---------------------------------------|
| 2.1-2.4 | Practice     | 7  | Filler       | Shape   | Context  | Click on the yellow oval.             |
| 2.1-2.4 | Practice     | 7  | Filler       | Shape   | Critical | Now click on the yellow diamond.      |
| 2.1-2.4 | Practice     | 8  | Experimental | Color   | Context  | Click on the purple circle.           |
| 2.1-2.4 | Practice     | 8  | Experimental | Color   | Critical | Now click on the red circle.          |
| 2.1-2.4 | Experimental | 1  | Experimental | Both    | Context  | Click on the blue circle.             |
| 2.1-2.4 | Experimental | 1  | Experimental | Both    | Critical | Now click on the yellow triangle.     |
| 2.1-2.4 | Experimental | 2  | Experimental | Color   | Context  | Click on the blue rectangle.          |
| 2.1-2.4 | Experimental | 2  | Experimental | Color   | Critical | Now click on the green rectangle.     |
| 2.1-2.4 | Experimental | 3  | Filler       | Neither | Context  | Click on the white star.              |
| 2.1-2.4 | Experimental | 3  | Filler       | Neither | Critical | Now click on the white star again.    |
| 2.1-2.4 | Experimental | 4  | Experimental | Color   | Context  | Click on the blue circle.             |
| 2.1-2.4 | Experimental | 4  | Experimental | Color   | Critical | Now click on the purple circle.       |
| 2.1-2.4 | Experimental | 5  | Experimental | Color   | Context  | Click on the blue triangle.           |
| 2.1-2.4 | Experimental | 5  | Experimental | Color   | Critical | Now click on the yellow triangle.     |
| 2.1-2.4 | Experimental | 6  | Filler       | Shape   | Context  | Click on the yellow circle.           |
| 2.1-2.4 | Experimental | 6  | Filler       | Shape   | Critical | Now click on the yellow square.       |
| 2.1-2.4 | Experimental | 7  | Filler       | Shape   | Context  | Click on the black diamond.           |
| 2.1-2.4 | Experimental | 7  | Filler       | Shape   | Critical | Now click on the black rectangle.     |
| 2.1-2.4 | Experimental | 8  | Filler       | Neither | Context  | Click on the black diamond.           |
| 2.1-2.4 | Experimental | 8  | Filler       | Neither | Critical | Now click on the black diamond again. |
| 2.1-2.4 | Experimental | 9  | Experimental | Both    | Context  | Click on the red oval.                |
| 2.1-2.4 | Experimental | 9  | Experimental | Both    | Critical | Now click on the yellow diamond.      |
| 2.1-2.4 | Experimental | 10 | Filler       | Shape   | Context  | Click on the white circle.            |
| 2.1-2.4 | Experimental | 10 | Filler       | Shape   | Critical | Now click on the white oval.          |
| 2.1-2.4 | Experimental | 11 | Experimental | Both    | Context  | Click on the black triangle.          |
| 2.1-2.4 | Experimental | 11 | Experimental | Both    | Critical | Now click on the purple diamond.      |
| 2.1-2.4 | Experimental | 12 | Filler       | Neither | Context  | Click on the yellow circle.           |
| 2.1-2.4 | Experimental | 12 | Filler       | Neither | Critical | Now click on the yellow circle again. |
| 2.1-2.4 | Experimental | 13 | Experimental | Both    | Context  | Click on the red square.              |
| 2.1-2.4 | Experimental | 13 | Experimental | Both    | Critical | Now click on the orange triangle.     |
| 2.1-2.4 | Experimental | 14 | Experimental | Color   | Context  | Click on the red triangle.            |
| 2.1-2.4 | Experimental | 14 | Experimental | Color   | Critical | Now click on the white triangle.      |



|         |              |    |              |         |          |                                        |
|---------|--------------|----|--------------|---------|----------|----------------------------------------|
| 2.1-2.4 | Experimental | 15 | Filler       | Neither | Context  | Click on the purple diamond.           |
| 2.1-2.4 | Experimental | 15 | Filler       | Neither | Critical | Now click on the purple diamond again. |
| 2.1-2.4 | Experimental | 16 | Filler       | Neither | Context  | Click on the green diamond.            |
| 2.1-2.4 | Experimental | 16 | Filler       | Neither | Critical | Now click on the green diamond again.  |
| 2.1-2.4 | Experimental | 17 | Filler       | Shape   | Context  | Click on the red heart.                |
| 2.1-2.4 | Experimental | 17 | Filler       | Shape   | Critical | Now click on the red circle.           |
| 2.1-2.4 | Experimental | 18 | Experimental | Both    | Context  | Click on the blue diamond.             |
| 2.1-2.4 | Experimental | 18 | Experimental | Both    | Critical | Now click on the black square.         |
| 2.1-2.4 | Experimental | 19 | Experimental | Both    | Context  | Click on the blue triangle.            |
| 2.1-2.4 | Experimental | 19 | Experimental | Both    | Critical | Now click on the white star.           |
| 2.1-2.4 | Experimental | 20 | Filler       | Shape   | Context  | Click on the green star.               |
| 2.1-2.4 | Experimental | 20 | Filler       | Shape   | Critical | Now click on the green square.         |
| 2.1-2.4 | Experimental | 21 | Filler       | Neither | Context  | Click on the blue heart.               |
| 2.1-2.4 | Experimental | 21 | Filler       | Neither | Critical | Now click on the blue heart again.     |
| 2.1-2.4 | Experimental | 22 | Experimental | Both    | Context  | Click on the yellow square.            |
| 2.1-2.4 | Experimental | 22 | Experimental | Both    | Critical | Now click on the orange circle.        |
| 2.1-2.4 | Experimental | 23 | Filler       | Neither | Context  | Click on the orange square.            |
| 2.1-2.4 | Experimental | 23 | Filler       | Neither | Critical | Now click on the orange square again.  |
| 2.1-2.4 | Experimental | 24 | Filler       | Shape   | Context  | Click on the blue circle.              |
| 2.1-2.4 | Experimental | 24 | Filler       | Shape   | Critical | Now click on the blue diamond.         |
| 2.1-2.4 | Experimental | 25 | Experimental | Color   | Context  | Click on the orange star.              |
| 2.1-2.4 | Experimental | 25 | Experimental | Color   | Critical | Now click on the purple star.          |
| 2.1-2.4 | Experimental | 26 | Filler       | Neither | Context  | Click on the red rectangle.            |
| 2.1-2.4 | Experimental | 26 | Filler       | Neither | Critical | Now click on the red rectangle again.  |
| 2.1-2.4 | Experimental | 27 | Filler       | Shape   | Context  | Click on the orange triangle.          |
| 2.1-2.4 | Experimental | 27 | Filler       | Shape   | Critical | Now click on the orange star.          |
| 2.1-2.4 | Experimental | 28 | Filler       | Shape   | Context  | Click on the purple diamond.           |
| 2.1-2.4 | Experimental | 28 | Filler       | Shape   | Critical | Now click on the purple heart.         |
| 2.1-2.4 | Experimental | 29 | Experimental | Color   | Context  | Click on the green square.             |
| 2.1-2.4 | Experimental | 29 | Experimental | Color   | Critical | Now click on the black square.         |
| 2.1-2.4 | Experimental | 30 | Experimental | Color   | Context  | Click on the yellow heart.             |
| 2.1-2.4 | Experimental | 30 | Experimental | Color   | Critical | Now click on the orange heart.         |

|         |              |    |              |         |          |                                          |
|---------|--------------|----|--------------|---------|----------|------------------------------------------|
| 2.1-2.4 | Experimental | 31 | Experimental | Color   | Context  | Click on the purple circle.              |
| 2.1-2.4 | Experimental | 31 | Experimental | Color   | Critical | Now click on the yellow circle.          |
| 2.1-2.4 | Experimental | 32 | Experimental | Both    | Context  | Click on the purple star.                |
| 2.1-2.4 | Experimental | 32 | Experimental | Both    | Critical | Now click on the black diamond.          |
| 2.1-2.4 | Experimental | 33 | Filler       | Shape   | Context  | Click on the orange diamond.             |
| 2.1-2.4 | Experimental | 33 | Filler       | Shape   | Critical | Now click on the orange square.          |
| 2.1-2.4 | Experimental | 34 | Experimental | Color   | Context  | Click on the green oval.                 |
| 2.1-2.4 | Experimental | 34 | Experimental | Color   | Critical | Now click on the black oval.             |
| 2.1-2.4 | Experimental | 35 | Filler       | Neither | Context  | Click on the purple rectangle.           |
| 2.1-2.4 | Experimental | 35 | Filler       | Neither | Critical | Now click on the purple rectangle again. |
| 2.1-2.4 | Experimental | 36 | Filler       | Shape   | Context  | Click on the yellow heart.               |
| 2.1-2.4 | Experimental | 36 | Filler       | Shape   | Critical | Now click on the yellow diamond.         |
| 2.1-2.4 | Experimental | 37 | Filler       | Shape   | Context  | Click on the green triangle.             |
| 2.1-2.4 | Experimental | 37 | Filler       | Shape   | Critical | Now click on the green oval.             |
| 2.1-2.4 | Experimental | 38 | Experimental | Both    | Context  | Click on the white oval.                 |
| 2.1-2.4 | Experimental | 38 | Experimental | Both    | Critical | Now click on the green star.             |
| 2.1-2.4 | Experimental | 39 | Filler       | Neither | Context  | Click on the yellow rectangle.           |
| 2.1-2.4 | Experimental | 39 | Filler       | Neither | Critical | Now click on the yellow rectangle again. |
| 2.1-2.4 | Experimental | 40 | Filler       | Shape   | Context  | Click on the black square.               |
| 2.1-2.4 | Experimental | 40 | Filler       | Shape   | Critical | Now click on the black circle.           |
| 2.1-2.4 | Experimental | 41 | Filler       | Neither | Context  | Click on the black square.               |
| 2.1-2.4 | Experimental | 41 | Filler       | Neither | Critical | Now click on the black square again.     |
| 2.1-2.4 | Experimental | 42 | Experimental | Both    | Context  | Click on the black star.                 |
| 2.1-2.4 | Experimental | 42 | Experimental | Both    | Critical | Now click on the red rectangle.          |
| 2.1-2.4 | Experimental | 43 | Experimental | Color   | Context  | Click on the green diamond.              |
| 2.1-2.4 | Experimental | 43 | Experimental | Color   | Critical | Now click on the red diamond.            |
| 2.1-2.4 | Experimental | 44 | Filler       | Shape   | Context  | Click on the purple circle.              |
| 2.1-2.4 | Experimental | 44 | Filler       | Shape   | Critical | Now click on the purple rectangle.       |
| 2.1-2.4 | Experimental | 45 | Experimental | Both    | Context  | Click on the red star.                   |
| 2.1-2.4 | Experimental | 45 | Experimental | Both    | Critical | Now click on the white square.           |
| 2.1-2.4 | Experimental | 46 | Experimental | Color   | Context  | Click on the green circle.               |
| 2.1-2.4 | Experimental | 46 | Experimental | Color   | Critical | Now click on the blue circle.            |

|         |              |    |              |         |          |                                      |
|---------|--------------|----|--------------|---------|----------|--------------------------------------|
| 2.1-2.4 | Experimental | 47 | Filler       | Shape   | Context  | Click on the blue rectangle.         |
| 2.1-2.4 | Experimental | 47 | Filler       | Shape   | Critical | Now click on the blue star.          |
| 2.1-2.4 | Experimental | 48 | Experimental | Both    | Context  | Click on the purple diamond.         |
| 2.1-2.4 | Experimental | 48 | Experimental | Both    | Critical | Now click on the red star.           |
| 2.1-2.4 | Experimental | 49 | Filler       | Neither | Context  | Click on the red triangle.           |
| 2.1-2.4 | Experimental | 49 | Filler       | Neither | Critical | Now click on the red triangle again. |
| 2.1-2.4 | Experimental | 50 | Experimental | Both    | Context  | Click on the orange diamond.         |
| 2.1-2.4 | Experimental | 50 | Experimental | Both    | Critical | Now click on the red square.         |
| 2.1-2.4 | Experimental | 51 | Filler       | Shape   | Context  | Click on the red triangle.           |
| 2.1-2.4 | Experimental | 51 | Filler       | Shape   | Critical | Now click on the red square.         |
| 2.1-2.4 | Experimental | 52 | Experimental | Both    | Context  | Click on the green oval.             |
| 2.1-2.4 | Experimental | 52 | Experimental | Both    | Critical | Now click on the blue rectangle.     |
| 2.1-2.4 | Experimental | 53 | Experimental | Color   | Context  | Click on the red square.             |
| 2.1-2.4 | Experimental | 53 | Experimental | Color   | Critical | Now click on the white square.       |
| 2.1-2.4 | Experimental | 54 | Filler       | Neither | Context  | Click on the black heart.            |
| 2.1-2.4 | Experimental | 54 | Filler       | Neither | Critical | Now click on the black heart again.  |
| 2.1-2.4 | Experimental | 55 | Filler       | Neither | Context  | Click on the orange heart.           |
| 2.1-2.4 | Experimental | 55 | Filler       | Neither | Critical | Now click on the orange heart again. |
| 2.1-2.4 | Experimental | 56 | Filler       | Shape   | Context  | Click on the white circle.           |
| 2.1-2.4 | Experimental | 56 | Filler       | Shape   | Critical | Now click on the white heart.        |
| 2.1-2.4 | Experimental | 57 | Filler       | Neither | Context  | Click on the green heart.            |
| 2.1-2.4 | Experimental | 57 | Filler       | Neither | Critical | Now click on the green heart again.  |
| 2.1-2.4 | Experimental | 58 | Filler       | Shape   | Context  | Click on the orange oval.            |
| 2.1-2.4 | Experimental | 58 | Filler       | Shape   | Critical | Now click on the orange circle.      |
| 2.1-2.4 | Experimental | 59 | Filler       | Shape   | Context  | Click on the yellow diamond.         |
| 2.1-2.4 | Experimental | 59 | Filler       | Shape   | Critical | Now click on the yellow oval.        |
| 2.1-2.4 | Experimental | 60 | Experimental | Color   | Context  | Click on the purple heart.           |
| 2.1-2.4 | Experimental | 60 | Experimental | Color   | Critical | Now click on the white heart.        |
| 2.1-2.4 | Experimental | 61 | Experimental | Both    | Context  | Click on the green rectangle.        |
| 2.1-2.4 | Experimental | 61 | Experimental | Both    | Critical | Now click on the orange oval.        |
| 2.1-2.4 | Experimental | 62 | Experimental | Both    | Context  | Click on the green heart.            |
| 2.1-2.4 | Experimental | 62 | Experimental | Both    | Critical | Now click on the purple triangle.    |

|         |              |    |              |         |          |                                          |
|---------|--------------|----|--------------|---------|----------|------------------------------------------|
| 2.1-2.4 | Experimental | 63 | Filler       | Neither | Context  | Click on the white triangle.             |
| 2.1-2.4 | Experimental | 63 | Filler       | Neither | Critical | Now click on the white triangle again.   |
| 2.1-2.4 | Experimental | 64 | Filler       | Shape   | Context  | Click on the green oval.                 |
| 2.1-2.4 | Experimental | 64 | Filler       | Shape   | Critical | Now click on the green triangle.         |
| 2.1-2.4 | Experimental | 65 | Experimental | Color   | Context  | Click on the orange square.              |
| 2.1-2.4 | Experimental | 65 | Experimental | Color   | Critical | Now click on the blue square.            |
| 2.1-2.4 | Experimental | 66 | Experimental | Color   | Context  | Click on the purple square.              |
| 2.1-2.4 | Experimental | 66 | Experimental | Color   | Critical | Now click on the green square.           |
| 2.1-2.4 | Experimental | 67 | Experimental | Color   | Context  | Click on the yellow diamond.             |
| 2.1-2.4 | Experimental | 67 | Experimental | Color   | Critical | Now click on the purple diamond.         |
| 2.1-2.4 | Experimental | 68 | Filler       | Neither | Context  | Click on the orange rectangle.           |
| 2.1-2.4 | Experimental | 68 | Filler       | Neither | Critical | Now click on the orange rectangle again. |
| 2.1-2.4 | Experimental | 69 | Experimental | Both    | Context  | Click on the white triangle.             |
| 2.1-2.4 | Experimental | 69 | Experimental | Both    | Critical | Now click on the green circle.           |
| 2.1-2.4 | Experimental | 70 | Experimental | Color   | Context  | Click on the white star.                 |
| 2.1-2.4 | Experimental | 70 | Experimental | Color   | Critical | Now click on the black star.             |
| 2.1-2.4 | Experimental | 71 | Experimental | Color   | Context  | Click on the purple triangle.            |
| 2.1-2.4 | Experimental | 71 | Experimental | Color   | Critical | Now click on the green triangle.         |
| 2.1-2.4 | Experimental | 72 | Filler       | Neither | Context  | Click on the green oval.                 |
| 2.1-2.4 | Experimental | 72 | Filler       | Neither | Critical | Now click on the green oval again.       |
| 2.1-2.4 | Experimental | 73 | Experimental | Both    | Context  | Click on the yellow circle.              |
| 2.1-2.4 | Experimental | 73 | Experimental | Both    | Critical | Now click on the purple star.            |
| 2.1-2.4 | Experimental | 74 | Experimental | Color   | Context  | Click on the orange circle.              |
| 2.1-2.4 | Experimental | 74 | Experimental | Color   | Critical | Now click on the black circle.           |
| 2.1-2.4 | Experimental | 75 | Filler       | Neither | Context  | Click on the blue oval.                  |
| 2.1-2.4 | Experimental | 75 | Filler       | Neither | Critical | Now click on the blue oval again.        |
| 2.1-2.4 | Experimental | 76 | Experimental | Color   | Context  | Click on the white square.               |
| 2.1-2.4 | Experimental | 76 | Experimental | Color   | Critical | Now click on the yellow square.          |
| 2.1-2.4 | Experimental | 77 | Filler       | Neither | Context  | Click on the black triangle.             |
| 2.1-2.4 | Experimental | 77 | Filler       | Neither | Critical | Now click on the black triangle again.   |
| 2.1-2.4 | Experimental | 78 | Experimental | Both    | Context  | Click on the white heart.                |
| 2.1-2.4 | Experimental | 78 | Experimental | Both    | Critical | Now click on the purple square.          |

|         |              |    |              |         |          |                                      |
|---------|--------------|----|--------------|---------|----------|--------------------------------------|
| 2.1-2.4 | Experimental | 79 | Experimental | Color   | Context  | Click on the red diamond.            |
| 2.1-2.4 | Experimental | 79 | Experimental | Color   | Critical | Now click on the blue diamond.       |
| 2.1-2.4 | Experimental | 80 | Filler       | Neither | Context  | Click on the red star.               |
| 2.1-2.4 | Experimental | 80 | Filler       | Neither | Critical | Now click on the red star again.     |
| 2.1-2.4 | Experimental | 81 | Filler       | Shape   | Context  | Click on the black oval.             |
| 2.1-2.4 | Experimental | 81 | Filler       | Shape   | Critical | Now click on the black heart.        |
| 2.1-2.4 | Experimental | 82 | Filler       | Neither | Context  | Click on the blue square.            |
| 2.1-2.4 | Experimental | 82 | Filler       | Neither | Critical | Now click on the blue square again.  |
| 2.1-2.4 | Experimental | 83 | Experimental | Both    | Context  | Click on the black circle.           |
| 2.1-2.4 | Experimental | 83 | Experimental | Both    | Critical | Now click on the green oval.         |
| 2.1-2.4 | Experimental | 84 | Experimental | Both    | Context  | Click on the orange heart.           |
| 2.1-2.4 | Experimental | 84 | Experimental | Both    | Critical | Now click on the blue diamond.       |
| 2.1-2.4 | Experimental | 85 | Experimental | Color   | Context  | Click on the black diamond.          |
| 2.1-2.4 | Experimental | 85 | Experimental | Color   | Critical | Now click on the white diamond.      |
| 2.1-2.4 | Experimental | 86 | Filler       | Shape   | Context  | Click on the purple rectangle.       |
| 2.1-2.4 | Experimental | 86 | Filler       | Shape   | Critical | Now click on the purple triangle.    |
| 2.1-2.4 | Experimental | 87 | Filler       | Shape   | Context  | Click on the blue triangle.          |
| 2.1-2.4 | Experimental | 87 | Filler       | Shape   | Critical | Now click on the blue rectangle.     |
| 2.1-2.4 | Experimental | 88 | Experimental | Color   | Context  | Click on the black star.             |
| 2.1-2.4 | Experimental | 88 | Experimental | Color   | Critical | Now click on the blue star.          |
| 2.1-2.4 | Experimental | 89 | Filler       | Shape   | Context  | Click on the red rectangle.          |
| 2.1-2.4 | Experimental | 89 | Filler       | Shape   | Critical | Now click on the red star.           |
| 2.1-2.4 | Experimental | 90 | Filler       | Neither | Context  | Click on the yellow star.            |
| 2.1-2.4 | Experimental | 90 | Filler       | Neither | Critical | Now click on the yellow star again.  |
| 2.1-2.4 | Experimental | 91 | Filler       | Neither | Context  | Click on the white square.           |
| 2.1-2.4 | Experimental | 91 | Filler       | Neither | Critical | Now click on the white square again. |
| 2.1-2.4 | Experimental | 92 | Experimental | Both    | Context  | Click on the orange triangle.        |
| 2.1-2.4 | Experimental | 92 | Experimental | Both    | Critical | Now click on the yellow square.      |
| 2.1-2.4 | Experimental | 93 | Experimental | Color   | Context  | Click on the purple oval.            |
| 2.1-2.4 | Experimental | 93 | Experimental | Color   | Critical | Now click on the yellow oval.        |
| 2.1-2.4 | Experimental | 94 | Filler       | Shape   | Context  | Click on the white oval.             |
| 2.1-2.4 | Experimental | 94 | Filler       | Shape   | Critical | Now click on the white diamond.      |

|         |              |     |              |         |          |                                        |
|---------|--------------|-----|--------------|---------|----------|----------------------------------------|
| 2.1-2.4 | Experimental | 95  | Filler       | Neither | Context  | Click on the yellow diamond.           |
| 2.1-2.4 | Experimental | 95  | Filler       | Neither | Critical | Now click on the yellow diamond again. |
| 2.1-2.4 | Experimental | 96  | Experimental | Color   | Context  | Click on the blue star.                |
| 2.1-2.4 | Experimental | 96  | Experimental | Color   | Critical | Now click on the orange star.          |
| 2.1-2.4 | Experimental | 97  | Filler       | Shape   | Context  | Click on the blue square.              |
| 2.1-2.4 | Experimental | 97  | Filler       | Shape   | Critical | Now click on the blue circle.          |
| 2.1-2.4 | Experimental | 98  | Experimental | Color   | Context  | Click on the white diamond.            |
| 2.1-2.4 | Experimental | 98  | Experimental | Color   | Critical | Now click on the orange diamond.       |
| 2.1-2.4 | Experimental | 99  | Filler       | Neither | Context  | Click on the purple circle.            |
| 2.1-2.4 | Experimental | 99  | Filler       | Neither | Critical | Now click on the purple circle again.  |
| 2.1-2.4 | Experimental | 100 | Filler       | Neither | Context  | Click on the white oval.               |
| 2.1-2.4 | Experimental | 100 | Filler       | Neither | Critical | Now click on the white oval again.     |
| 2.1-2.4 | Experimental | 101 | Experimental | Color   | Context  | Click on the orange rectangle.         |
| 2.1-2.4 | Experimental | 101 | Experimental | Color   | Critical | Now click on the white rectangle.      |
| 2.1-2.4 | Experimental | 102 | Filler       | Shape   | Context  | Click on the black star.               |
| 2.1-2.4 | Experimental | 102 | Filler       | Shape   | Critical | Now click on the black oval.           |
| 2.1-2.4 | Experimental | 103 | Experimental | Color   | Context  | Click on the black triangle.           |
| 2.1-2.4 | Experimental | 103 | Experimental | Color   | Critical | Now click on the orange triangle.      |
| 2.1-2.4 | Experimental | 104 | Filler       | Neither | Context  | Click on the yellow heart.             |
| 2.1-2.4 | Experimental | 104 | Filler       | Neither | Critical | Now click on the yellow heart again.   |
| 2.1-2.4 | Experimental | 105 | Filler       | Neither | Context  | Click on the blue rectangle.           |
| 2.1-2.4 | Experimental | 105 | Filler       | Neither | Critical | Now click on the blue rectangle again. |
| 2.1-2.4 | Experimental | 106 | Filler       | Shape   | Context  | Click on the purple triangle.          |
| 2.1-2.4 | Experimental | 106 | Filler       | Shape   | Critical | Now click on the purple square.        |
| 2.1-2.4 | Experimental | 107 | Filler       | Shape   | Context  | Click on the red square.               |
| 2.1-2.4 | Experimental | 107 | Filler       | Shape   | Critical | Now click on the red heart.            |
| 2.1-2.4 | Experimental | 108 | Experimental | Both    | Context  | Click on the red rectangle.            |
| 2.1-2.4 | Experimental | 108 | Experimental | Both    | Critical | Now click on the white circle.         |
| 2.1-2.4 | Experimental | 109 | Experimental | Both    | Context  | Click on the orange star.              |
| 2.1-2.4 | Experimental | 109 | Experimental | Both    | Critical | Now click on the blue triangle.        |
| 2.1-2.4 | Experimental | 110 | Filler       | Shape   | Context  | Click on the orange square.            |
| 2.1-2.4 | Experimental | 110 | Filler       | Shape   | Critical | Now click on the orange triangle.      |

|         |              |     |              |         |          |                                      |
|---------|--------------|-----|--------------|---------|----------|--------------------------------------|
| 2.1-2.4 | Experimental | 111 | Filler       | Neither | Context  | Click on the red diamond.            |
| 2.1-2.4 | Experimental | 111 | Filler       | Neither | Critical | Now click on the red diamond again.  |
| 2.1-2.4 | Experimental | 112 | Experimental | Both    | Context  | Click on the black oval.             |
| 2.1-2.4 | Experimental | 112 | Experimental | Both    | Critical | Now click on the white heart.        |
| 2.1-2.4 | Experimental | 113 | Filler       | Shape   | Context  | Click on the green heart.            |
| 2.1-2.4 | Experimental | 113 | Filler       | Shape   | Critical | Now click on the green rectangle.    |
| 2.1-2.4 | Experimental | 114 | Experimental | Both    | Context  | Click on the white square.           |
| 2.1-2.4 | Experimental | 114 | Experimental | Both    | Critical | Now click on the green heart.        |
| 2.1-2.4 | Experimental | 115 | Experimental | Both    | Context  | Click on the purple rectangle.       |
| 2.1-2.4 | Experimental | 115 | Experimental | Both    | Critical | Now click on the black heart.        |
| 2.1-2.4 | Experimental | 116 | Filler       | Shape   | Context  | Click on the white rectangle.        |
| 2.1-2.4 | Experimental | 116 | Filler       | Shape   | Critical | Now click on the white star.         |
| 2.1-2.4 | Experimental | 117 | Experimental | Color   | Context  | Click on the blue heart.             |
| 2.1-2.4 | Experimental | 117 | Experimental | Color   | Critical | Now click on the yellow heart.       |
| 2.1-2.4 | Experimental | 118 | Experimental | Both    | Context  | Click on the yellow heart.           |
| 2.1-2.4 | Experimental | 118 | Experimental | Both    | Critical | Now click on the blue oval.          |
| 2.1-2.4 | Experimental | 119 | Filler       | Shape   | Context  | Click on the yellow oval.            |
| 2.1-2.4 | Experimental | 119 | Filler       | Shape   | Critical | Now click on the yellow triangle.    |
| 2.1-2.4 | Experimental | 120 | Experimental | Both    | Context  | Click on the green diamond.          |
| 2.1-2.4 | Experimental | 120 | Experimental | Both    | Critical | Now click on the yellow heart.       |
| 2.1-2.4 | Experimental | 121 | Experimental | Color   | Context  | Click on the orange oval.            |
| 2.1-2.4 | Experimental | 121 | Experimental | Color   | Critical | Now click on the red oval.           |
| 2.1-2.4 | Experimental | 122 | Filler       | Shape   | Context  | Click on the black circle.           |
| 2.1-2.4 | Experimental | 122 | Filler       | Shape   | Critical | Now click on the black star.         |
| 2.1-2.4 | Experimental | 123 | Filler       | Neither | Context  | Click on the black circle.           |
| 2.1-2.4 | Experimental | 123 | Filler       | Neither | Critical | Now click on the black circle again. |
| 2.1-2.4 | Experimental | 124 | Experimental | Color   | Context  | Click on the yellow oval.            |
| 2.1-2.4 | Experimental | 124 | Experimental | Color   | Critical | Now click on the green oval.         |
| 2.1-2.4 | Experimental | 125 | Filler       | Shape   | Context  | Click on the red star.               |
| 2.1-2.4 | Experimental | 125 | Filler       | Shape   | Critical | Now click on the red diamond.        |
| 2.1-2.4 | Experimental | 126 | Experimental | Both    | Context  | Click on the orange rectangle.       |
| 2.1-2.4 | Experimental | 126 | Experimental | Both    | Critical | Now click on the white oval.         |

|         |              |     |              |         |          |                                        |
|---------|--------------|-----|--------------|---------|----------|----------------------------------------|
| 2.1-2.4 | Experimental | 127 | Filler       | Neither | Context  | Click on the green star.               |
| 2.1-2.4 | Experimental | 127 | Filler       | Neither | Critical | Now click on the green star again.     |
| 2.1-2.4 | Experimental | 128 | Experimental | Color   | Context  | Click on the white heart.              |
| 2.1-2.4 | Experimental | 128 | Experimental | Color   | Critical | Now click on the purple heart.         |
| 2.1-2.4 | Experimental | 129 | Experimental | Color   | Context  | Click on the white rectangle.          |
| 2.1-2.4 | Experimental | 129 | Experimental | Color   | Critical | Now click on the orange rectangle.     |
| 2.1-2.4 | Experimental | 130 | Experimental | Both    | Context  | Click on the yellow triangle.          |
| 2.1-2.4 | Experimental | 130 | Experimental | Both    | Critical | Now click on the orange rectangle.     |
| 2.1-2.4 | Experimental | 131 | Filler       | Neither | Context  | Click on the orange oval.              |
| 2.1-2.4 | Experimental | 131 | Filler       | Neither | Critical | Now click on the orange oval again.    |
| 2.1-2.4 | Experimental | 132 | Experimental | Both    | Context  | Click on the purple circle.            |
| 2.1-2.4 | Experimental | 132 | Experimental | Both    | Critical | Now click on the green rectangle.      |
| 2.1-2.4 | Experimental | 133 | Experimental | Color   | Context  | Click on the black circle.             |
| 2.1-2.4 | Experimental | 133 | Experimental | Color   | Critical | Now click on the red circle.           |
| 2.1-2.4 | Experimental | 134 | Filler       | Shape   | Context  | Click on the orange triangle.          |
| 2.1-2.4 | Experimental | 134 | Filler       | Shape   | Critical | Now click on the orange diamond.       |
| 2.1-2.4 | Experimental | 135 | Experimental | Both    | Context  | Click on the green square.             |
| 2.1-2.4 | Experimental | 135 | Experimental | Both    | Critical | Now click on the black star.           |
| 2.1-2.4 | Experimental | 136 | Experimental | Both    | Context  | Click on the red circle.               |
| 2.1-2.4 | Experimental | 136 | Experimental | Both    | Critical | Now click on the black oval.           |
| 2.1-2.4 | Experimental | 137 | Experimental | Color   | Context  | Click on the yellow rectangle.         |
| 2.1-2.4 | Experimental | 137 | Experimental | Color   | Critical | Now click on the black rectangle.      |
| 2.1-2.4 | Experimental | 138 | Experimental | Both    | Context  | Click on the white diamond.            |
| 2.1-2.4 | Experimental | 138 | Experimental | Both    | Critical | Now click on the purple rectangle.     |
| 2.1-2.4 | Experimental | 139 | Filler       | Shape   | Context  | Click on the purple heart.             |
| 2.1-2.4 | Experimental | 139 | Filler       | Shape   | Critical | Now click on the purple oval.          |
| 2.1-2.4 | Experimental | 140 | Filler       | Neither | Context  | Click on the white circle.             |
| 2.1-2.4 | Experimental | 140 | Filler       | Neither | Critical | Now click on the white circle again.   |
| 2.1-2.4 | Experimental | 141 | Filler       | Neither | Context  | Click on the black triangle.           |
| 2.1-2.4 | Experimental | 141 | Filler       | Neither | Critical | Now click on the black triangle again. |
| 2.1-2.4 | Experimental | 142 | Experimental | Both    | Context  | Click on the yellow oval.              |
| 2.1-2.4 | Experimental | 142 | Experimental | Both    | Critical | Now click on the orange heart.         |



|         |              |     |              |         |          |                                       |
|---------|--------------|-----|--------------|---------|----------|---------------------------------------|
| 2.1-2.4 | Experimental | 143 | Filler       | Neither | Context  | Click on the blue triangle.           |
| 2.1-2.4 | Experimental | 143 | Filler       | Neither | Critical | Now click on the blue triangle again. |
| 2.1-2.4 | Experimental | 144 | Filler       | Neither | Context  | Click on the green square.            |
| 2.1-2.4 | Experimental | 144 | Filler       | Neither | Critical | Now click on the green square again.  |
| 2.1-2.4 | Experimental | 145 | Filler       | Shape   | Context  | Click on the yellow square.           |
| 2.1-2.4 | Experimental | 145 | Filler       | Shape   | Critical | Now click on the yellow heart.        |
| 2.1-2.4 | Experimental | 146 | Filler       | Neither | Context  | Click on the red oval.                |
| 2.1-2.4 | Experimental | 146 | Filler       | Neither | Critical | Now click on the red oval again.      |
| 2.1-2.4 | Experimental | 147 | Experimental | Both    | Context  | Click on the black rectangle.         |
| 2.1-2.4 | Experimental | 147 | Experimental | Both    | Critical | Now click on the red triangle.        |
| 2.1-2.4 | Experimental | 148 | Experimental | Color   | Context  | Click on the black rectangle.         |
| 2.1-2.4 | Experimental | 148 | Experimental | Color   | Critical | Now click on the red rectangle.       |
| 2.1-2.4 | Experimental | 149 | Experimental | Color   | Context  | Click on the yellow triangle.         |
| 2.1-2.4 | Experimental | 149 | Experimental | Color   | Critical | Now click on the blue triangle.       |
| 2.1-2.4 | Experimental | 150 | Experimental | Both    | Context  | Click on the blue star.               |
| 2.1-2.4 | Experimental | 150 | Experimental | Both    | Critical | Now click on the red diamond.         |
| 2.1-2.4 | Experimental | 151 | Experimental | Both    | Context  | Click on the blue heart.              |
| 2.1-2.4 | Experimental | 151 | Experimental | Both    | Critical | Now click on the yellow circle.       |
| 2.1-2.4 | Experimental | 152 | Experimental | Color   | Context  | Click on the green star.              |
| 2.1-2.4 | Experimental | 152 | Experimental | Color   | Critical | Now click on the red star.            |
| 2.1-2.4 | Experimental | 153 | Filler       | Shape   | Context  | Click on the white heart.             |
| 2.1-2.4 | Experimental | 153 | Filler       | Shape   | Critical | Now click on the white rectangle.     |
| 2.1-2.4 | Experimental | 154 | Experimental | Color   | Context  | Click on the red heart.               |
| 2.1-2.4 | Experimental | 154 | Experimental | Color   | Critical | Now click on the green heart.         |
| 2.1-2.4 | Experimental | 155 | Filler       | Neither | Context  | Click on the purple star.             |
| 2.1-2.4 | Experimental | 155 | Filler       | Neither | Critical | Now click on the purple star again.   |
| 2.1-2.4 | Experimental | 156 | Experimental | Both    | Context  | Click on the purple square.           |
| 2.1-2.4 | Experimental | 156 | Experimental | Both    | Critical | Now click on the blue circle.         |
| 2.1-2.4 | Experimental | 157 | Filler       | Shape   | Context  | Click on the blue star.               |
| 2.1-2.4 | Experimental | 157 | Filler       | Shape   | Critical | Now click on the blue triangle.       |
| 2.1-2.4 | Experimental | 158 | Filler       | Shape   | Context  | Click on the green diamond.           |
| 2.1-2.4 | Experimental | 158 | Filler       | Shape   | Critical | Now click on the green circle.        |

|         |              |     |              |         |          |                                       |
|---------|--------------|-----|--------------|---------|----------|---------------------------------------|
| 2.1-2.4 | Experimental | 159 | Filler       | Neither | Context  | Click on the orange circle.           |
| 2.1-2.4 | Experimental | 159 | Filler       | Neither | Critical | Now click on the orange circle again. |
| 2.1-2.4 | Experimental | 160 | Experimental | Color   | Context  | Click on the red oval.                |
| 2.1-2.4 | Experimental | 160 | Experimental | Color   | Critical | Now click on the purple oval.         |

**Appendix D. Complete list of trials used in norming study.**

| List    | Expt. | Trial no. | Experimental vs. filler | Contrast | Type     | Sentence                          |
|---------|-------|-----------|-------------------------|----------|----------|-----------------------------------|
| 1.1-1.4 | 1     | 4         | Experimental            | Both     | Context  | Click on the purple square.       |
| 1.1-1.4 | 1     | 4         | Experimental            | Both     | Critical | Now click on the white heart.     |
| 1.1-1.4 | 1     | 19        | Experimental            | Color    | Context  | Click on the yellow circle.       |
| 1.1-1.4 | 1     | 19        | Experimental            | Color    | Critical | Now click on the orange circle.   |
| 1.1-1.4 | 1     | 42        | Experimental            | Color    | Context  | Click on the white heart.         |
| 1.1-1.4 | 1     | 42        | Experimental            | Color    | Critical | Now click on the green heart.     |
| 1.1-1.4 | 1     | 45        | Experimental            | Color    | Context  | Click on the green triangle.      |
| 1.1-1.4 | 1     | 45        | Experimental            | Color    | Critical | Now click on the purple triangle. |
| 1.1-1.4 | 1     | 48        | Experimental            | Color    | Context  | Click on the blue circle.         |
| 1.1-1.4 | 1     | 48        | Experimental            | Color    | Critical | Now click on the yellow circle.   |
| 1.1-1.4 | 1     | 60        | Experimental            | Both     | Context  | Click on the blue oval.           |
| 1.1-1.4 | 1     | 60        | Experimental            | Both     | Critical | Now click on the yellow triangle. |
| 1.1-1.4 | 1     | 61        | Experimental            | Color    | Context  | Click on the yellow oval.         |
| 1.1-1.4 | 1     | 61        | Experimental            | Color    | Critical | Now click on the blue oval.       |
| 1.1-1.4 | 1     | 65        | Experimental            | Both     | Context  | Click on the green square.        |
| 1.1-1.4 | 1     | 65        | Experimental            | Both     | Critical | Now click on the blue circle.     |
| 1.1-1.4 | 1     | 70        | Experimental            | Both     | Context  | Click on the green square.        |
| 1.1-1.4 | 1     | 70        | Experimental            | Both     | Critical | Now click on the black oval.      |
| 1.1-1.4 | 1     | 71        | Experimental            | Both     | Context  | Click on the purple star.         |
| 1.1-1.4 | 1     | 71        | Experimental            | Both     | Critical | Now click on the green triangle.  |
| 1.1-1.4 | 1     | 85        | Experimental            | Both     | Context  | Click on the purple triangle.     |
| 1.1-1.4 | 1     | 85        | Experimental            | Both     | Critical | Now click on the green square.    |
| 1.1-1.4 | 1     | 92        | Experimental            | Color    | Context  | Click on the green star.          |
| 1.1-1.4 | 1     | 92        | Experimental            | Color    | Critical | Now click on the black star.      |
| 1.1-1.4 | 1     | 112       | Experimental            | Color    | Context  | Click on the red circle.          |
| 1.1-1.4 | 1     | 112       | Experimental            | Color    | Critical | Now click on the white circle.    |
| 1.1-1.4 | 1     | 128       | Experimental            | Both     | Context  | Click on the blue circle.         |
| 1.1-1.4 | 1     | 128       | Experimental            | Both     | Critical | Now click on the green rectangle. |

|         |   |     |              |         |          |                                        |
|---------|---|-----|--------------|---------|----------|----------------------------------------|
| 1.1-1.4 | 1 | 133 | Experimental | Both    | Context  | Click on the yellow diamond.           |
| 1.1-1.4 | 1 | 133 | Experimental | Both    | Critical | Now click on the orange heart.         |
| 1.1-1.4 | 1 | 147 | Experimental | Color   | Context  | Click on the purple heart.             |
| 1.1-1.4 | 1 | 147 | Experimental | Color   | Critical | Now click on the black heart.          |
| 1.1-1.4 | 2 | 6   | Filler       | Neither | Context  | Click on the yellow square.            |
| 1.1-1.4 | 2 | 6   | Filler       | Neither | Critical | Now click on the yellow square again.  |
| 1.1-1.4 | 2 | 8   | Filler       | Shape   | Context  | Click on the black circle.             |
| 1.1-1.4 | 2 | 8   | Filler       | Shape   | Critical | Now click on the black diamond.        |
| 1.1-1.4 | 2 | 15  | Filler       | Shape   | Context  | Click on the purple circle.            |
| 1.1-1.4 | 2 | 15  | Filler       | Shape   | Critical | Now click on the purple diamond.       |
| 1.1-1.4 | 2 | 24  | Filler       | Neither | Context  | Click on the blue diamond.             |
| 1.1-1.4 | 2 | 24  | Filler       | Neither | Critical | Now click on the blue diamond again.   |
| 1.1-1.4 | 2 | 33  | Filler       | Neither | Context  | Click on the orange square.            |
| 1.1-1.4 | 2 | 33  | Filler       | Neither | Critical | Now click on the orange square again.  |
| 1.1-1.4 | 2 | 64  | Filler       | Neither | Context  | Click on the green triangle.           |
| 1.1-1.4 | 2 | 64  | Filler       | Neither | Critical | Now click on the green triangle again. |
| 1.1-1.4 | 2 | 75  | Filler       | Shape   | Context  | Click on the blue square.              |
| 1.1-1.4 | 2 | 75  | Filler       | Shape   | Critical | Now click on the blue oval.            |
| 1.1-1.4 | 2 | 81  | Filler       | Neither | Context  | Click on the black heart.              |
| 1.1-1.4 | 2 | 81  | Filler       | Neither | Critical | Now click on the black heart again.    |
| 1.1-1.4 | 2 | 82  | Filler       | Shape   | Context  | Click on the blue rectangle.           |
| 1.1-1.4 | 2 | 82  | Filler       | Shape   | Critical | Now click on the blue square.          |
| 1.1-1.4 | 2 | 95  | Filler       | Shape   | Context  | Click on the yellow square.            |
| 1.1-1.4 | 2 | 95  | Filler       | Shape   | Critical | Now click on the yellow diamond.       |
| 1.1-1.4 | 2 | 97  | Filler       | Neither | Context  | Click on the blue circle.              |
| 1.1-1.4 | 2 | 97  | Filler       | Neither | Critical | Now click on the blue circle again.    |
| 1.1-1.4 | 2 | 107 | Filler       | Neither | Context  | Click on the red heart.                |
| 1.1-1.4 | 2 | 107 | Filler       | Neither | Critical | Now click on the red heart again.      |
| 1.1-1.4 | 2 | 125 | Filler       | Neither | Context  | Click on the red diamond.              |
| 1.1-1.4 | 2 | 125 | Filler       | Neither | Critical | Now click on the red diamond again.    |
| 1.1-1.4 | 2 | 143 | Filler       | Shape   | Context  | Click on the blue heart.               |
| 1.1-1.4 | 2 | 143 | Filler       | Shape   | Critical | Now click on the blue triangle.        |

|         |   |     |              |       |          |                                   |
|---------|---|-----|--------------|-------|----------|-----------------------------------|
| 1.1-1.4 | 2 | 144 | Filler       | Shape | Context  | Click on the green triangle.      |
| 1.1-1.4 | 2 | 144 | Filler       | Shape | Critical | Now click on the green square.    |
| 1.1-1.4 | 2 | 155 | Filler       | Shape | Context  | Click on the purple heart.        |
| 1.1-1.4 | 2 | 155 | Filler       | Shape | Critical | Now click on the purple star.     |
| 2.1-2.4 | 1 | 4   | Experimental | Color | Context  | Click on the purple heart.        |
| 2.1-2.4 | 1 | 4   | Experimental | Color | Critical | Now click on the white heart.     |
| 2.1-2.4 | 1 | 19  | Experimental | Both  | Context  | Click on the yellow square.       |
| 2.1-2.4 | 1 | 19  | Experimental | Both  | Critical | Now click on the orange circle.   |
| 2.1-2.4 | 1 | 42  | Experimental | Both  | Context  | Click on the white square.        |
| 2.1-2.4 | 1 | 42  | Experimental | Both  | Critical | Now click on the green heart.     |
| 2.1-2.4 | 1 | 45  | Experimental | Both  | Context  | Click on the green heart.         |
| 2.1-2.4 | 1 | 45  | Experimental | Both  | Critical | Now click on the purple triangle. |
| 2.1-2.4 | 1 | 48  | Experimental | Both  | Context  | Click on the blue heart.          |
| 2.1-2.4 | 1 | 48  | Experimental | Both  | Critical | Now click on the yellow circle.   |
| 2.1-2.4 | 1 | 60  | Experimental | Color | Context  | Click on the blue triangle.       |
| 2.1-2.4 | 1 | 60  | Experimental | Color | Critical | Now click on the yellow triangle. |
| 2.1-2.4 | 1 | 61  | Experimental | Both  | Context  | Click on the yellow heart.        |
| 2.1-2.4 | 1 | 61  | Experimental | Both  | Critical | Now click on the blue oval.       |
| 2.1-2.4 | 1 | 65  | Experimental | Color | Context  | Click on the green circle.        |
| 2.1-2.4 | 1 | 65  | Experimental | Color | Critical | Now click on the blue circle.     |
| 2.1-2.4 | 1 | 70  | Experimental | Color | Context  | Click on the green oval.          |
| 2.1-2.4 | 1 | 70  | Experimental | Color | Critical | Now click on the black oval.      |
| 2.1-2.4 | 1 | 71  | Experimental | Color | Context  | Click on the purple triangle.     |
| 2.1-2.4 | 1 | 71  | Experimental | Color | Critical | Now click on the green triangle.  |
| 2.1-2.4 | 1 | 85  | Experimental | Color | Context  | Click on the purple square.       |
| 2.1-2.4 | 1 | 85  | Experimental | Color | Critical | Now click on the green square.    |
| 2.1-2.4 | 1 | 92  | Experimental | Both  | Context  | Click on the green square.        |
| 2.1-2.4 | 1 | 92  | Experimental | Both  | Critical | Now click on the black star.      |
| 2.1-2.4 | 1 | 112 | Experimental | Both  | Context  | Click on the red rectangle.       |
| 2.1-2.4 | 1 | 112 | Experimental | Both  | Critical | Now click on the white circle.    |
| 2.1-2.4 | 1 | 128 | Experimental | Color | Context  | Click on the blue rectangle.      |
| 2.1-2.4 | 1 | 128 | Experimental | Color | Critical | Now click on the green rectangle. |

|         |   |     |              |         |          |                                        |
|---------|---|-----|--------------|---------|----------|----------------------------------------|
| 2.1-2.4 | 1 | 133 | Experimental | Color   | Context  | Click on the yellow heart.             |
| 2.1-2.4 | 1 | 133 | Experimental | Color   | Critical | Now click on the orange heart.         |
| 2.1-2.4 | 1 | 147 | Experimental | Both    | Context  | Click on the purple rectangle.         |
| 2.1-2.4 | 1 | 147 | Experimental | Both    | Critical | Now click on the black heart.          |
| 2.1-2.4 | 2 | 6   | Filler       | Shape   | Context  | Click on the yellow circle.            |
| 2.1-2.4 | 2 | 6   | Filler       | Shape   | Critical | Now click on the yellow square.        |
| 2.1-2.4 | 2 | 8   | Filler       | Neither | Context  | Click on the black diamond.            |
| 2.1-2.4 | 2 | 8   | Filler       | Neither | Critical | Now click on the black diamond again.  |
| 2.1-2.4 | 2 | 15  | Filler       | Neither | Context  | Click on the purple diamond.           |
| 2.1-2.4 | 2 | 15  | Filler       | Neither | Critical | Now click on the purple diamond again. |
| 2.1-2.4 | 2 | 24  | Filler       | Shape   | Context  | Click on the blue circle.              |
| 2.1-2.4 | 2 | 24  | Filler       | Shape   | Critical | Now click on the blue diamond.         |
| 2.1-2.4 | 2 | 33  | Filler       | Shape   | Context  | Click on the orange diamond.           |
| 2.1-2.4 | 2 | 33  | Filler       | Shape   | Critical | Now click on the orange square.        |
| 2.1-2.4 | 2 | 64  | Filler       | Shape   | Context  | Click on the green oval.               |
| 2.1-2.4 | 2 | 64  | Filler       | Shape   | Critical | Now click on the green triangle.       |
| 2.1-2.4 | 2 | 75  | Filler       | Neither | Context  | Click on the blue oval.                |
| 2.1-2.4 | 2 | 75  | Filler       | Neither | Critical | Now click on the blue oval again.      |
| 2.1-2.4 | 2 | 81  | Filler       | Shape   | Context  | Click on the black oval.               |
| 2.1-2.4 | 2 | 81  | Filler       | Shape   | Critical | Now click on the black heart.          |
| 2.1-2.4 | 2 | 82  | Filler       | Neither | Context  | Click on the blue square.              |
| 2.1-2.4 | 2 | 82  | Filler       | Neither | Critical | Now click on the blue square again.    |
| 2.1-2.4 | 2 | 95  | Filler       | Neither | Context  | Click on the yellow diamond.           |
| 2.1-2.4 | 2 | 95  | Filler       | Neither | Critical | Now click on the yellow diamond again. |
| 2.1-2.4 | 2 | 97  | Filler       | Shape   | Context  | Click on the blue square.              |
| 2.1-2.4 | 2 | 97  | Filler       | Shape   | Critical | Now click on the blue circle.          |
| 2.1-2.4 | 2 | 107 | Filler       | Shape   | Context  | Click on the red square.               |
| 2.1-2.4 | 2 | 107 | Filler       | Shape   | Critical | Now click on the red heart.            |
| 2.1-2.4 | 2 | 125 | Filler       | Shape   | Context  | Click on the red star.                 |
| 2.1-2.4 | 2 | 125 | Filler       | Shape   | Critical | Now click on the red diamond.          |
| 2.1-2.4 | 2 | 143 | Filler       | Neither | Context  | Click on the blue triangle.            |
| 2.1-2.4 | 2 | 143 | Filler       | Neither | Critical | Now click on the blue triangle again.  |

|         |   |     |        |         |          |                                      |
|---------|---|-----|--------|---------|----------|--------------------------------------|
| 2.1-2.4 | 2 | 144 | Filler | Neither | Context  | Click on the green square.           |
| 2.1-2.4 | 2 | 144 | Filler | Neither | Critical | Now click on the green square again. |
| 2.1-2.4 | 2 | 155 | Filler | Neither | Context  | Click on the purple star.            |
| 2.1-2.4 | 2 | 155 | Filler | Neither | Critical | Now click on the purple star again.  |
