# Supplementary material
Source: PubMed Central journal article supplement (PMC9059426)
Supplement: NIHMS1738657-supplement-Supplemental_Material_3.pdf [file NIHMS1738657-supplement-Supplemental_Material_3.pdf]

## Experimental Design Tables

**Table S1**

*Number of Trials for All Independent Variable Combinations by List for Expt. 1. Lists: P = Practice, E = Experimental; Accenting: Con = Contrastive, Pres = Presentational.*<sup>1</sup>

| List | Color-contrast |      |         |      | Color- + shape-contrast |      |         |      | Shape-contrast | Neither-contrast |
|------|----------------|------|---------|------|-------------------------|------|---------|------|----------------|------------------|
|      | Beat           |      | No beat |      | Beat                    |      | No beat |      | Beat           | No beat          |
|      | Con            | Pres | Con     | Pres | Con                     | Pres | Con     | Pres | Con            | Pres             |
| P1.1 | 1              | 1    | 0       | 0    | 0                       | 0    | 1       | 1    | 2              | 2                |
| P1.2 | 1              | 1    | 0       | 0    | 0                       | 0    | 1       | 1    | 2              | 2                |
| P1.3 | 0              | 0    | 1       | 1    | 1                       | 1    | 0       | 0    | 2              | 2                |
| P1.4 | 0              | 0    | 1       | 1    | 1                       | 1    | 0       | 0    | 2              | 2                |
| P2.1 | 1              | 1    | 0       | 0    | 0                       | 0    | 1       | 1    | 2              | 2                |
| P2.2 | 1              | 1    | 0       | 0    | 0                       | 0    | 1       | 1    | 2              | 2                |
| P2.3 | 0              | 0    | 1       | 1    | 1                       | 1    | 0       | 0    | 2              | 2                |
| P2.4 | 0              | 0    | 1       | 1    | 1                       | 1    | 0       | 0    | 2              | 2                |
| E1.1 | 20             | 20   | 0       | 0    | 0                       | 0    | 20      | 20   | 40             | 40               |
| E1.2 | 20             | 20   | 0       | 0    | 0                       | 0    | 20      | 20   | 40             | 40               |
| E1.3 | 0              | 0    | 20      | 20   | 20                      | 20   | 0       | 0    | 40             | 40               |
| E1.4 | 0              | 0    | 20      | 20   | 20                      | 20   | 0       | 0    | 40             | 40               |
| E2.1 | 20             | 20   | 0       | 0    | 0                       | 0    | 20      | 20   | 40             | 40               |
| E2.2 | 20             | 20   | 0       | 0    | 0                       | 0    | 20      | 20   | 40             | 40               |
| E2.3 | 0              | 0    | 20      | 20   | 20                      | 20   | 0       | 0    | 40             | 40               |
| E2.4 | 0              | 0    | 20      | 20   | 20                      | 20   | 0       | 0    | 40             | 40               |

<sup>1</sup>Assignment of critical experimental trials to beat gesture and pitch accent conditions by contrast type was split across lists because it was believed at the time of design that at least 20 trials per condition per participant were necessary for analysis. Assignment across all conditions for each list was implemented in Expt. 2 (see Table S10).

**Table S2**

*Number of Sentences by Block (Practice, Experimental), Continuation (Context, Critical), and Accenting (Contrastive, Presentational) Used in List Sets 1.1-1.4 and 2.1-2.2.*

| Block        | Type     | Sentence | Accenting      | Lists 1.1-1.4 | Lists 2.1-2.4 |
|--------------|----------|----------|----------------|---------------|---------------|
| Practice     | Critical | Context  | Presentational | 4             | 4             |
|              |          | Critical | Contrastive    | 4             | 4             |
|              |          |          | Presentational | 4             | 4             |
|              | Filler   | Context  | Presentational | 4             | 4             |
|              |          | Critical | Contrastive    | 4             | 4             |
|              |          |          | Presentational | 4             | 4             |
| Experimental | Critical | Context  | Presentational | 80            | 80            |
|              |          | Critical | Contrastive    | 80            | 80            |
|              |          |          | Presentational | 80            | 80            |
|              | Filler   | Context  | Presentational | 80            | 80            |
|              |          | Critical | Contrastive    | 80            | 80            |
|              |          |          | Presentational | 80            | 80            |

**Table S3**

*Summary of Experiment 1 and 2 Filler Item Attributes. F Indicates Felicitous Use of Pitch Accenting or Beat Gesture to Convey Contrast; I Indicates Infelicitous Use*

| Experiment | Contrast | Cue word | Pitch accent       | Gesture  |
|------------|----------|----------|--------------------|----------|
| 1          | Shape    | Shape    | Contrastive (F)    | Beat (F) |
| 1          | Neither  | Shape    | Presentational (F) | None (F) |
| 2          | Shape    | Color    | Contrastive (I)    | Beat (I) |
| 2          | Shape    | Color    | Contrastive (I)    | None (F) |
| 2          | Shape    | Color    | Presentational (F) | Beat (F) |
| 2          | Shape    | Color    | Presentational (F) | None (I) |
| 2          | Neither  | Color    | Contrastive (I)    | Beat (I) |
| 2          | Neither  | Color    | Contrastive (I)    | None (F) |
| 2          | Neither  | Color    | Presentational (F) | Beat (I) |
| 2          | Neither  | Color    | Presentational (F) | None (F) |

**Table S4**

*Key Independent and Counterbalancing Variables for First Critical Trial by List (1.1-1.4: Click on the blue star. → Now click on the white star.; 2.1-2.4: Click on the blue triangle. → Now click on the white star). Accenting: Con = Contrastive, Pres = Presentational; Object Location: UL = Upper Left, UR = Upper Right, LL = Lower Left, LR = Lower Right; Video Orientation: L = Left, R = Right.*

| List | Contrast      | Gesture | Accent | Initial object | Target object | Competitor object | Distractor object | Initial location | Target location | Competitor location | Distractor location | Video orientation |
|------|---------------|---------|--------|----------------|---------------|-------------------|-------------------|------------------|-----------------|---------------------|---------------------|-------------------|
| 1.1  | Color         | Beat    | Con    | Blue star      | White star    | White heart       | Blue heart        | LR               | LL              | UR                  | UL                  | R                 |
| 1.2  | Color         | Beat    | Pres   | Blue star      | White star    | White heart       | Blue heart        | LL               | UR              | UL                  | LR                  | L                 |
| 1.3  | Color         | No beat | Con    | Blue star      | White star    | White heart       | Blue heart        | UR               | UL              | LR                  | LL                  | L                 |
| 1.4  | Color         | No beat | Pres   | Blue star      | White star    | White heart       | Blue heart        | UL               | LR              | LL                  | UR                  | R                 |
| 2.1  | Color + Shape | Beat    | Con    | Blue triangle  | White star    | Blue star         | White triangle    | LR               | LL              | UR                  | UL                  | R                 |
| 2.2  | Color + Shape | Beat    | Pres   | Blue triangle  | White star    | Blue star         | White triangle    | LL               | UR              | UL                  | LR                  | L                 |
| 2.3  | Color + Shape | No beat | Con    | Blue triangle  | White star    | Blue star         | White triangle    | UR               | UL              | LR                  | LL                  | R                 |
| 2.4  | Color + Shape | No beat | Pres   | Blue triangle  | White star    | Blue star         | White triangle    | UL               | LR              | LL                  | UR                  | L                 |

**Table S5**

*Key Independent and Counterbalancing Variables for First Filler Trial by List for Expt. 1. (1.1-1.4: Click on the white circle. → Now click on the white star.; 2.1-2.4: Click on the white star. → Now click on the white star again). Accenting: Con = Contrastive, Pres = Presentational; Object Location: UL = Upper Left, UR = Upper Right, LL = Lower Left, LR = Lower Right; Video Orientation: L = Left, R = Right. Note: Target and Initial Objects are Identical (White Star) for Lists 2.1-2.4.*

| List | Contrast | Gesture | Accent | Initial object | Target object | Competitor object | Distractor object | Initial location | Target location | Competitor location | Distractor location | Video orientation |
|------|----------|---------|--------|----------------|---------------|-------------------|-------------------|------------------|-----------------|---------------------|---------------------|-------------------|
| 1.1  | Shape    | Beat    | Con    | White circle   | White star    | Red star          | Red circle        | UL               | LR              | LL                  | UR                  | R                 |
| 1.2  | Shape    | Beat    | Con    | White circle   | White star    | Red star          | Red circle        | LR               | LL              | UR                  | LR                  | R                 |
| 1.3  | Shape    | Beat    | Con    | White circle   | White star    | Red star          | Red circle        | LL               | UR              | LR                  | UL                  | L                 |
| 1.4  | Shape    | Beat    | Con    | White circle   | White star    | Red star          | Red circle        | UR               | LR              | UL                  | LL                  | L                 |
| 2.1  | Neither  | No beat | Pres   | White star     | White star    | White circle      | Red circle        | UL               | LR              | LL                  | UR                  | R                 |
| 2.2  | Neither  | No beat | Pres   | White star     | White star    | White circle      | Red circle        | LR               | LL              | UR                  | LR                  | L                 |
| 2.3  | Neither  | No beat | Pres   | White star     | White star    | White circle      | Red circle        | LL               | UR              | LR                  | UL                  | R                 |
| 2.4  | Neither  | No beat | Pres   | White star     | White star    | White circle      | Red circle        | UR               | LR              | UL                  | LL                  | L                 |



**Table S7**

*Key Independent and Counterbalancing Variables for First Filler Trial by List for Expt. 2. (1.1-1.4: Click on the white circle. → Now click on the white star.; 2.1-2.4: Click on the white star. → Now click on the white star again). Accenting: Con = Contrastive, Pres = Presentational; Object Location: UL = Upper Left, UR = Upper Right, LL = Lower Left, LR = Lower Right; Video Orientation: L = Left, R = Right. Note: Target and Initial Objects are Identical (White Star) for Lists 2.1-2.4.*

| List | Contrast | Gesture | Accent | Initial object | Target object | Competitor object | Distractor object | Initial quadrant | Target quadrant | Competitor quadrant | Distractor quadrant | Video orientation |
|------|----------|---------|--------|----------------|---------------|-------------------|-------------------|------------------|-----------------|---------------------|---------------------|-------------------|
| 1.1  | Shape    | Beat    | Con    | White circle   | White star    | Red star          | Red circle        | UL               | LR              | LL                  | UR                  | R                 |
| 1.2  | Shape    | Beat    | Pres   | White circle   | White star    | Red star          | Red circle        | LR               | LL              | UR                  | LR                  | R                 |
| 1.3  | Shape    | Beat    | Con    | White circle   | White star    | Red star          | Red circle        | LL               | UR              | LR                  | UL                  | L                 |
| 1.4  | Shape    | Beat    | Pres   | White circle   | White star    | Red star          | Red circle        | UR               | LR              | UL                  | LL                  | L                 |
| 2.1  | Neither  | No beat | Con    | White star     | White star    | White circle      | Red circle        | UL               | LR              | LL                  | UR                  | R                 |
| 2.2  | Neither  | No beat | Pres   | White star     | White star    | White circle      | Red circle        | LR               | LL              | UR                  | LR                  | L                 |
| 2.3  | Neither  | No beat | Con    | White star     | White star    | White circle      | Red circle        | LL               | UR              | LR                  | UL                  | R                 |
| 2.4  | Neither  | No beat | Pres   | White star     | White star    | White circle      | Red circle        | UR               | LR              | UL                  | LL                  | L                 |

**Table S8**

*Number of Videos by Block (Practice, Experimental), Continuation (Context, Critical),*

*Accenting (Contrastive, Presentational), and Gesture (Beat, No Beat) Used in List Sets 1.1-1.4*

*and 2.1-2.2 in Expt. 1.*

| Block        | Type     | Sentence | Gesture | Accent         | Lists<br>1.1-1.4 | Lists 2.1-<br>2.4 |
|--------------|----------|----------|---------|----------------|------------------|-------------------|
| Practice     | Critical | Context  | No beat | Presentational | 4                | 4                 |
|              |          |          | Beat    | Contrastive    | 4                | 4                 |
|              |          | Critical | Beat    | Presentational | 4                | 4                 |
|              |          |          | No beat | Contrastive    | 4                | 4                 |
|              |          |          | No beat | Presentational | 4                | 4                 |
|              | Filler   | Context  | No beat | Presentational | 4                | 4                 |
|              |          |          | Beat    | Contrastive    | 4                | 4                 |
|              |          | Critical | No beat | Presentational | 4                | 4                 |
|              |          |          | Beat    | Contrastive    | 4                | 4                 |
|              |          |          | No beat | Presentational | 4                | 4                 |
| Experimental | Critical | Context  | No beat | Presentational | 80               | 80                |
|              |          |          | Beat    | Contrastive    | 80               | 80                |
|              |          | Critical | Beat    | Presentational | 80               | 80                |
|              |          |          | No beat | Contrastive    | 80               | 80                |
|              |          |          | No beat | Presentational | 80               | 80                |
|              | Filler   | Context  | No beat | Presentational | 80               | 80                |
|              |          |          | Beat    | Contrastive    | 80               | 80                |
|              |          | Critical | No beat | Presentational | 80               | 80                |
|              |          |          | Beat    | Contrastive    | 80               | 80                |
|              |          |          | No beat | Presentational | 80               | 80                |
